# Supplementary material for: The Molecular Epidemiology of Clade 2.3.4.4B H5N1 High Pathogenicity Avian Influenza in Southern Africa, 2021–2022
Source: MDPI journal article supplement (doi:10.3390/v15061383), 2023-06-16

Figure S1.(a) to (h).

1(a)

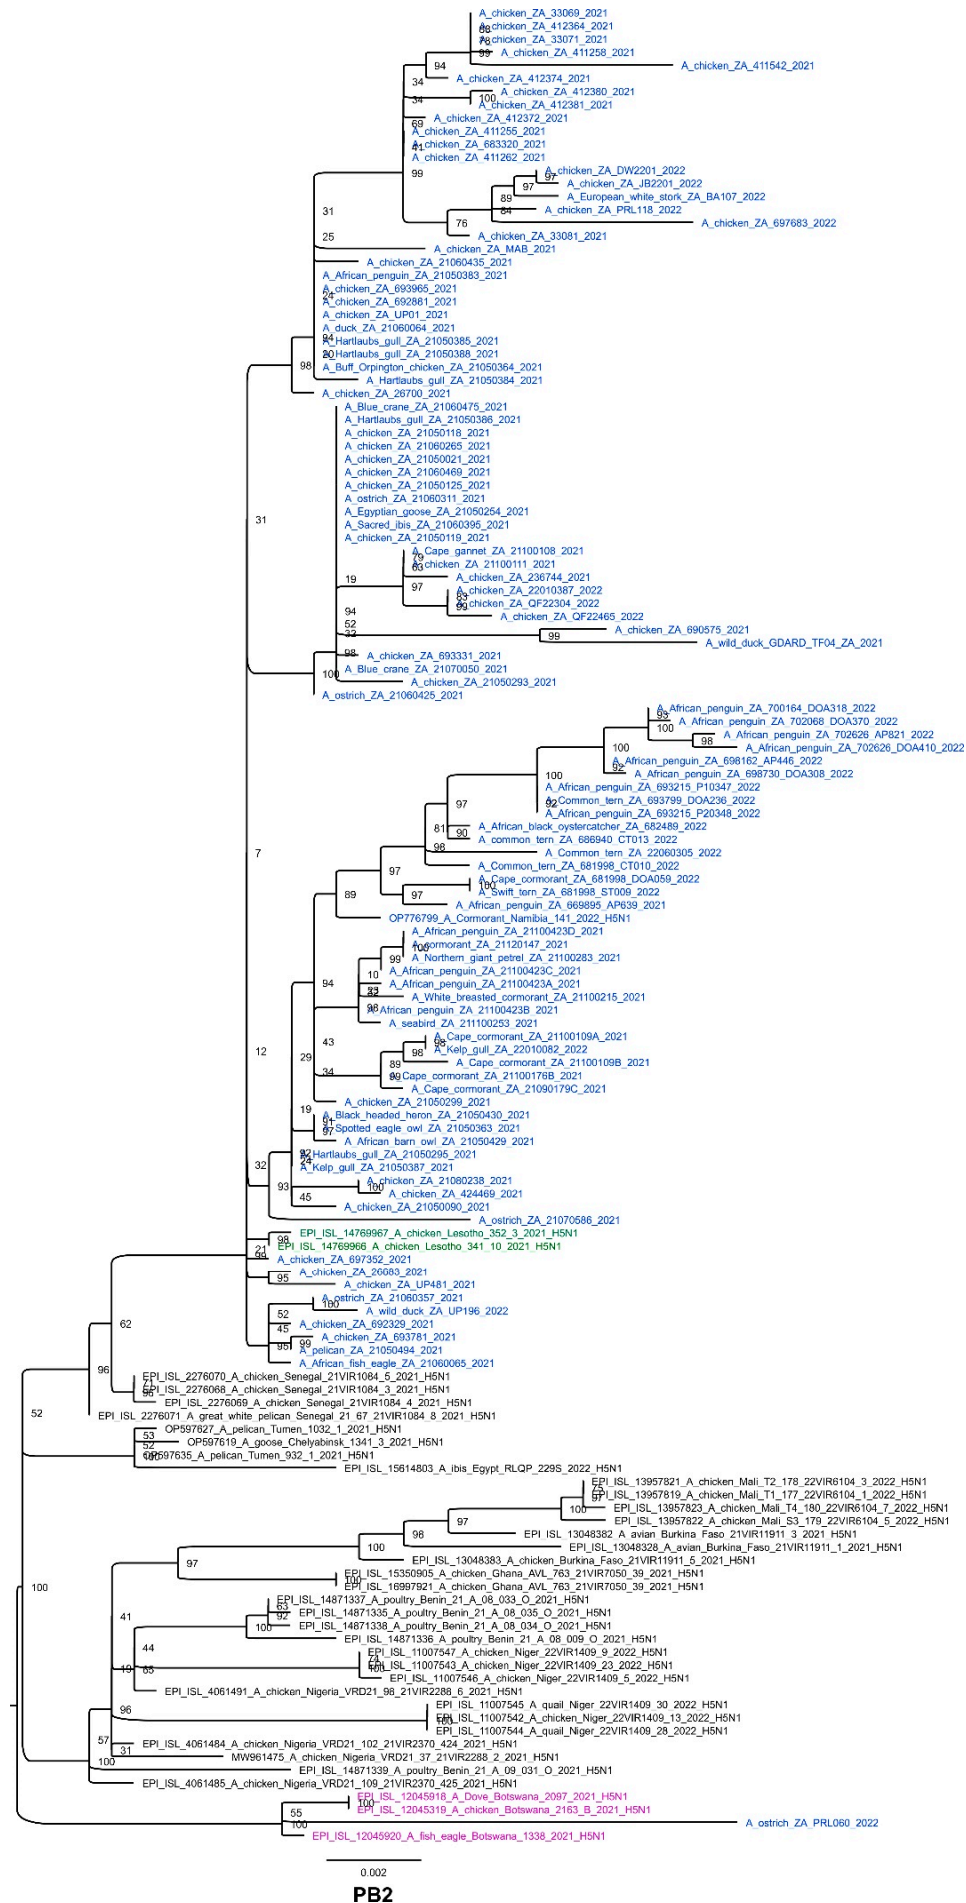

1(b)

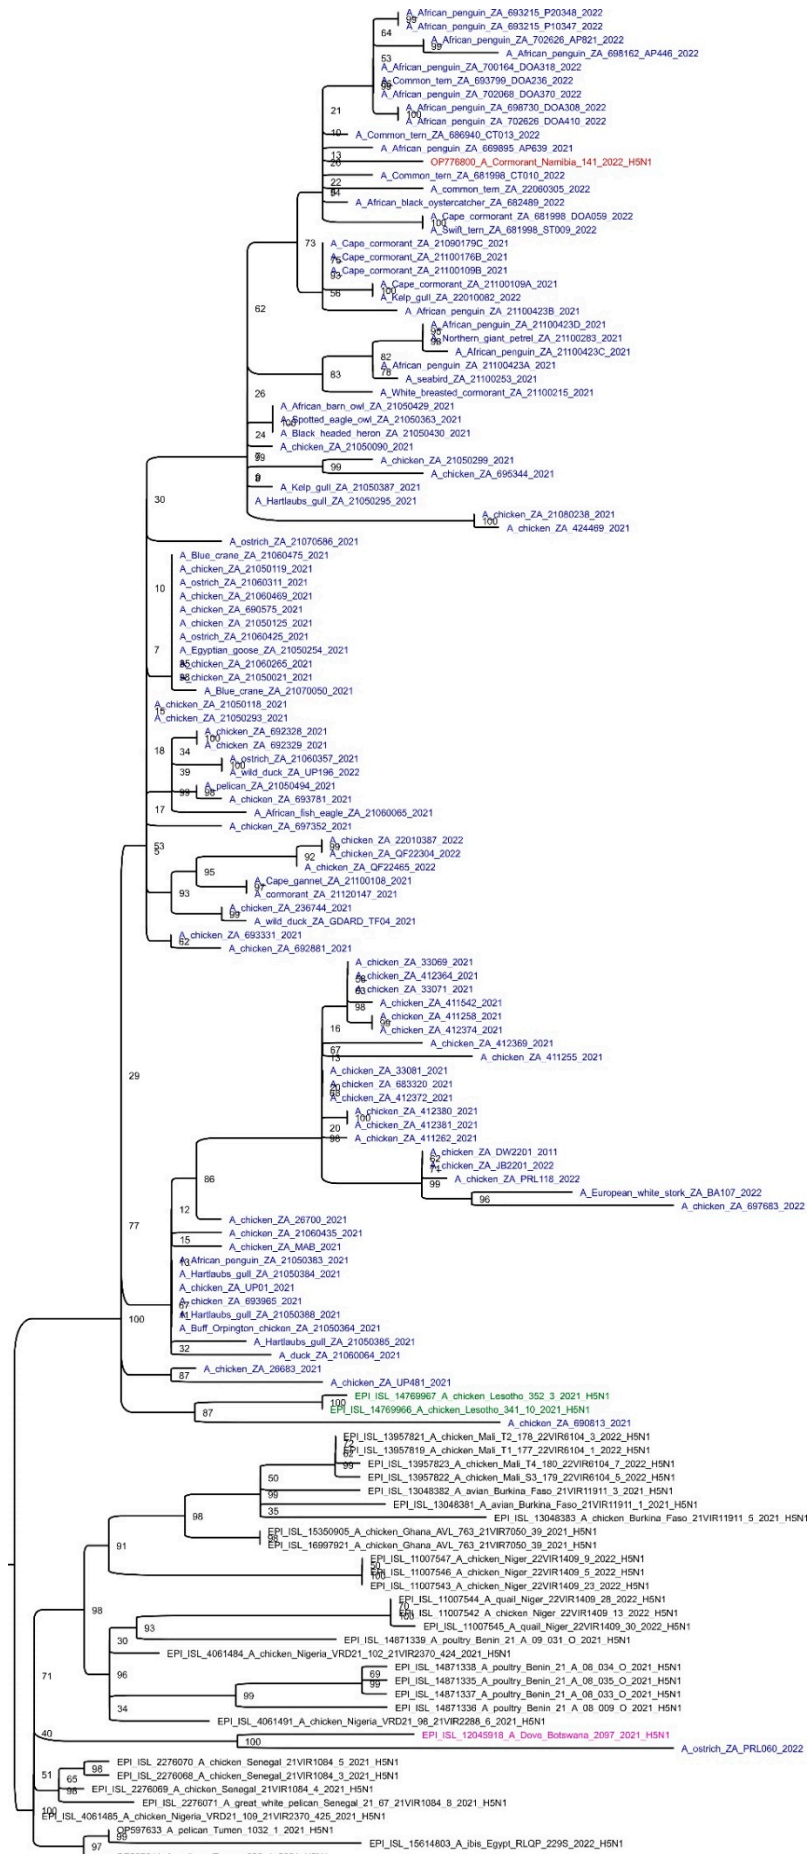

1(c)

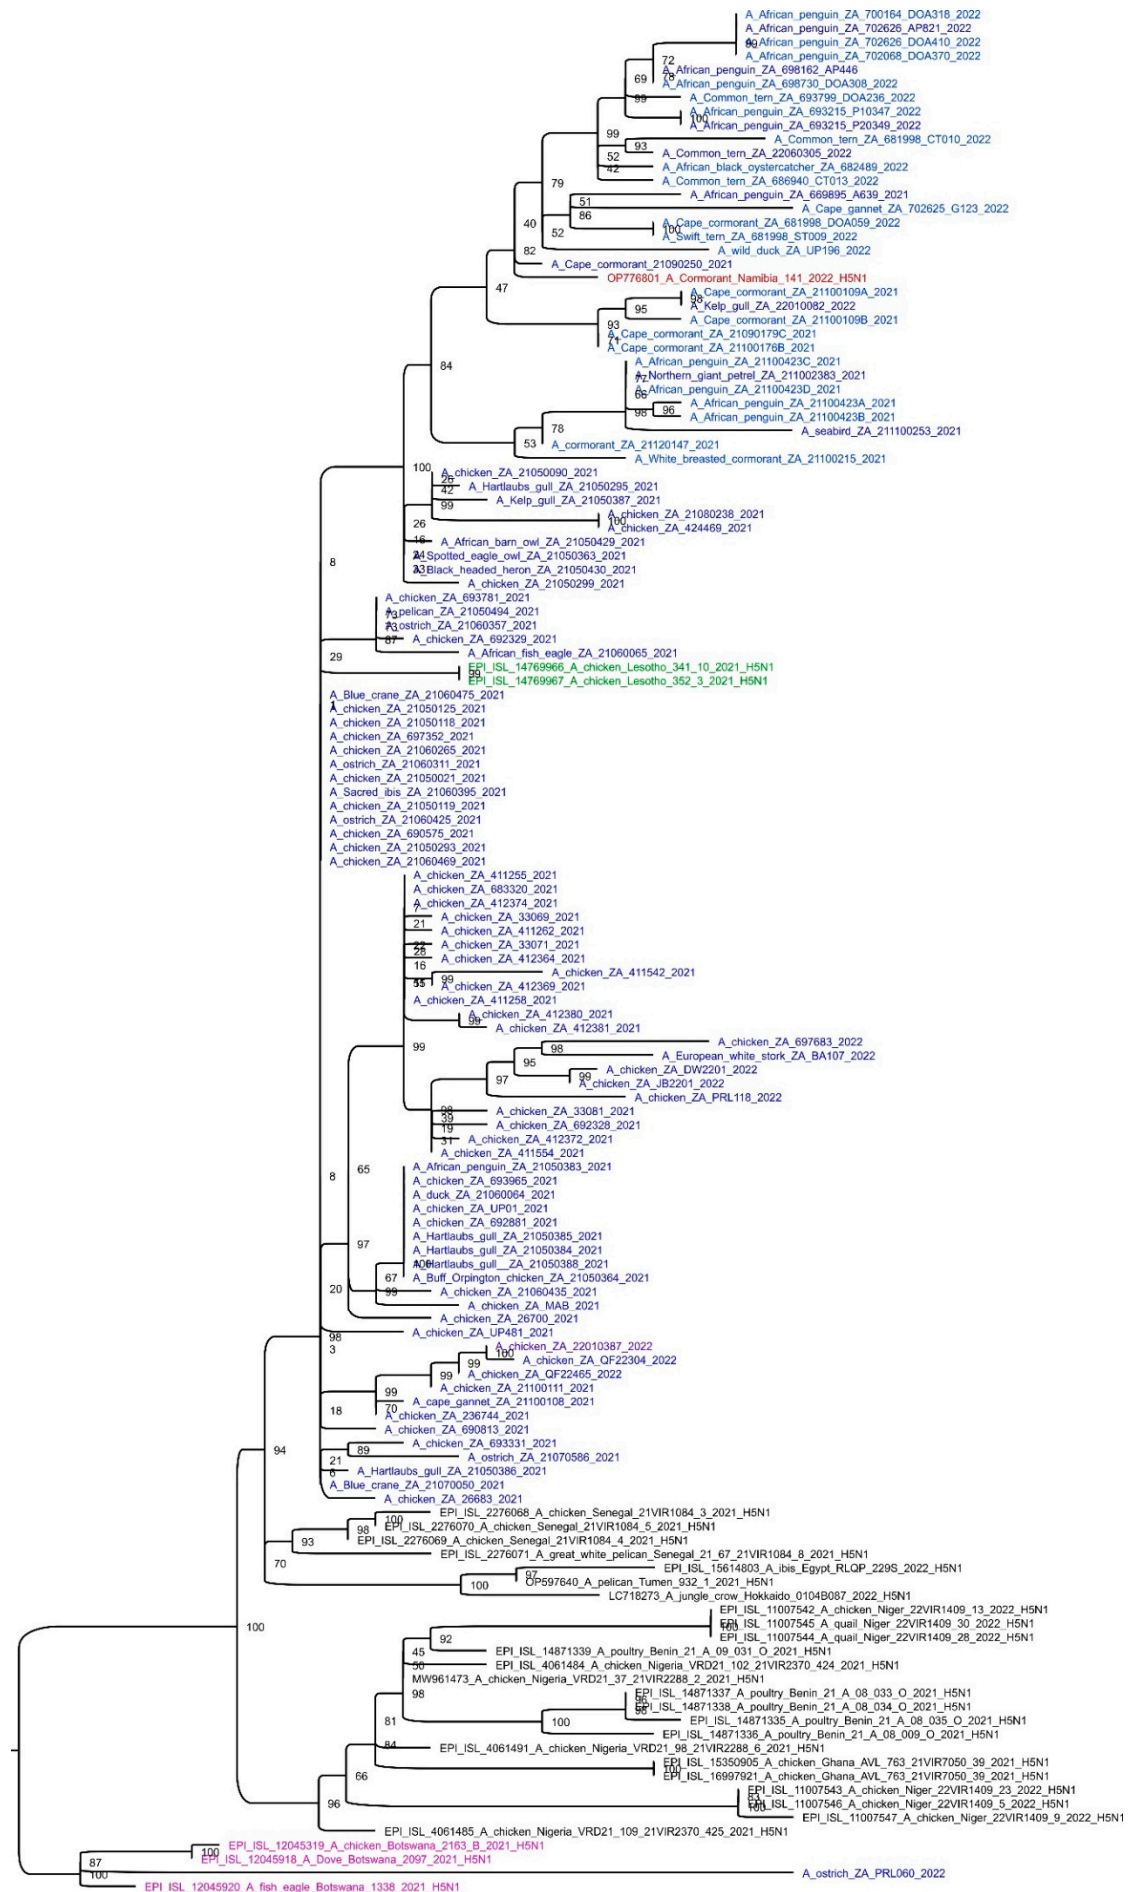

0.002

PA

1(d)

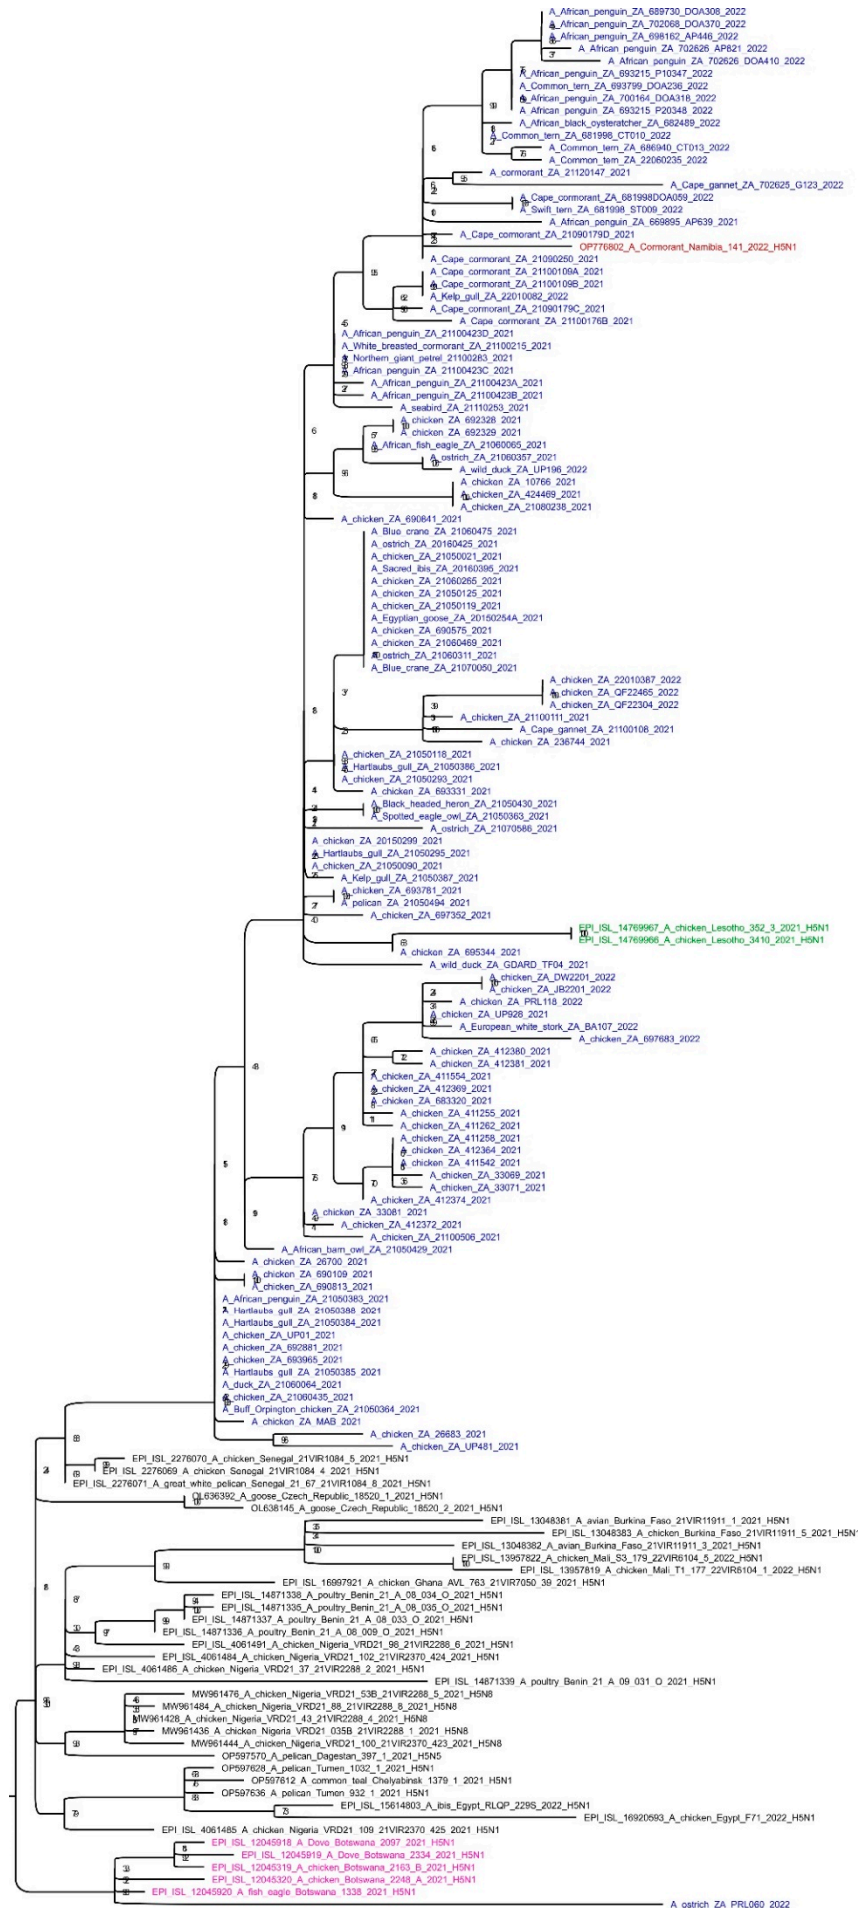

0.002

HA



1(e)

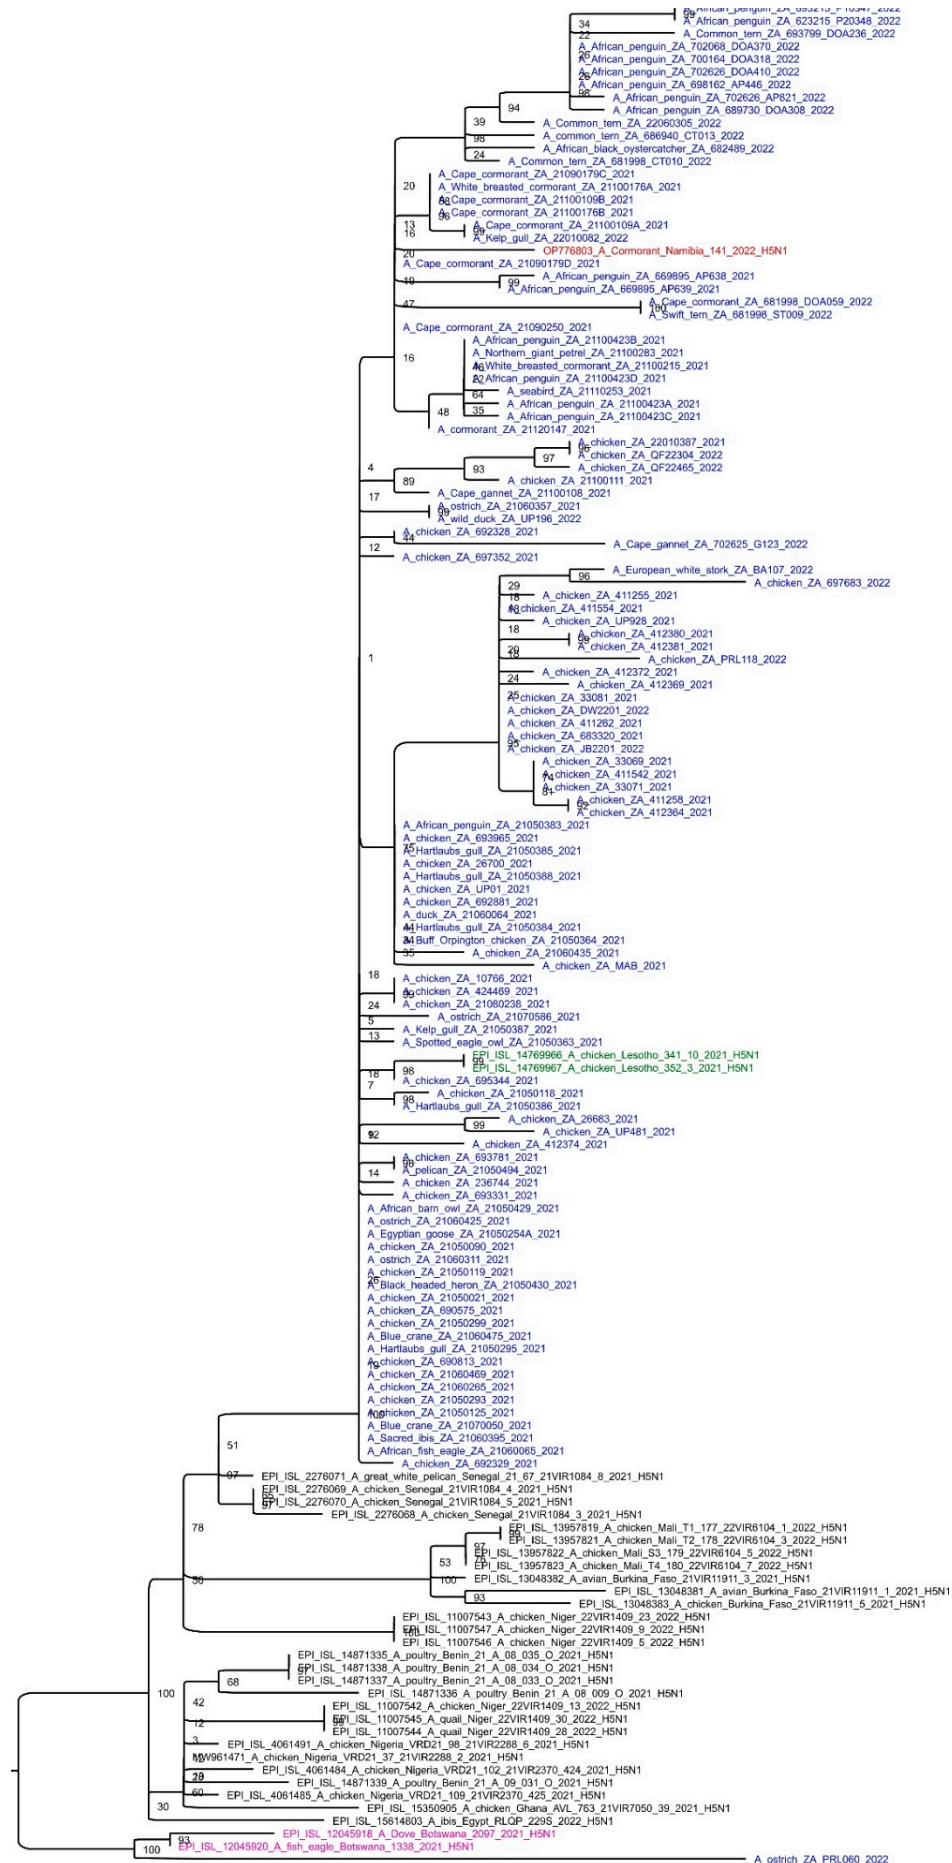

0.002

NP

1(f)

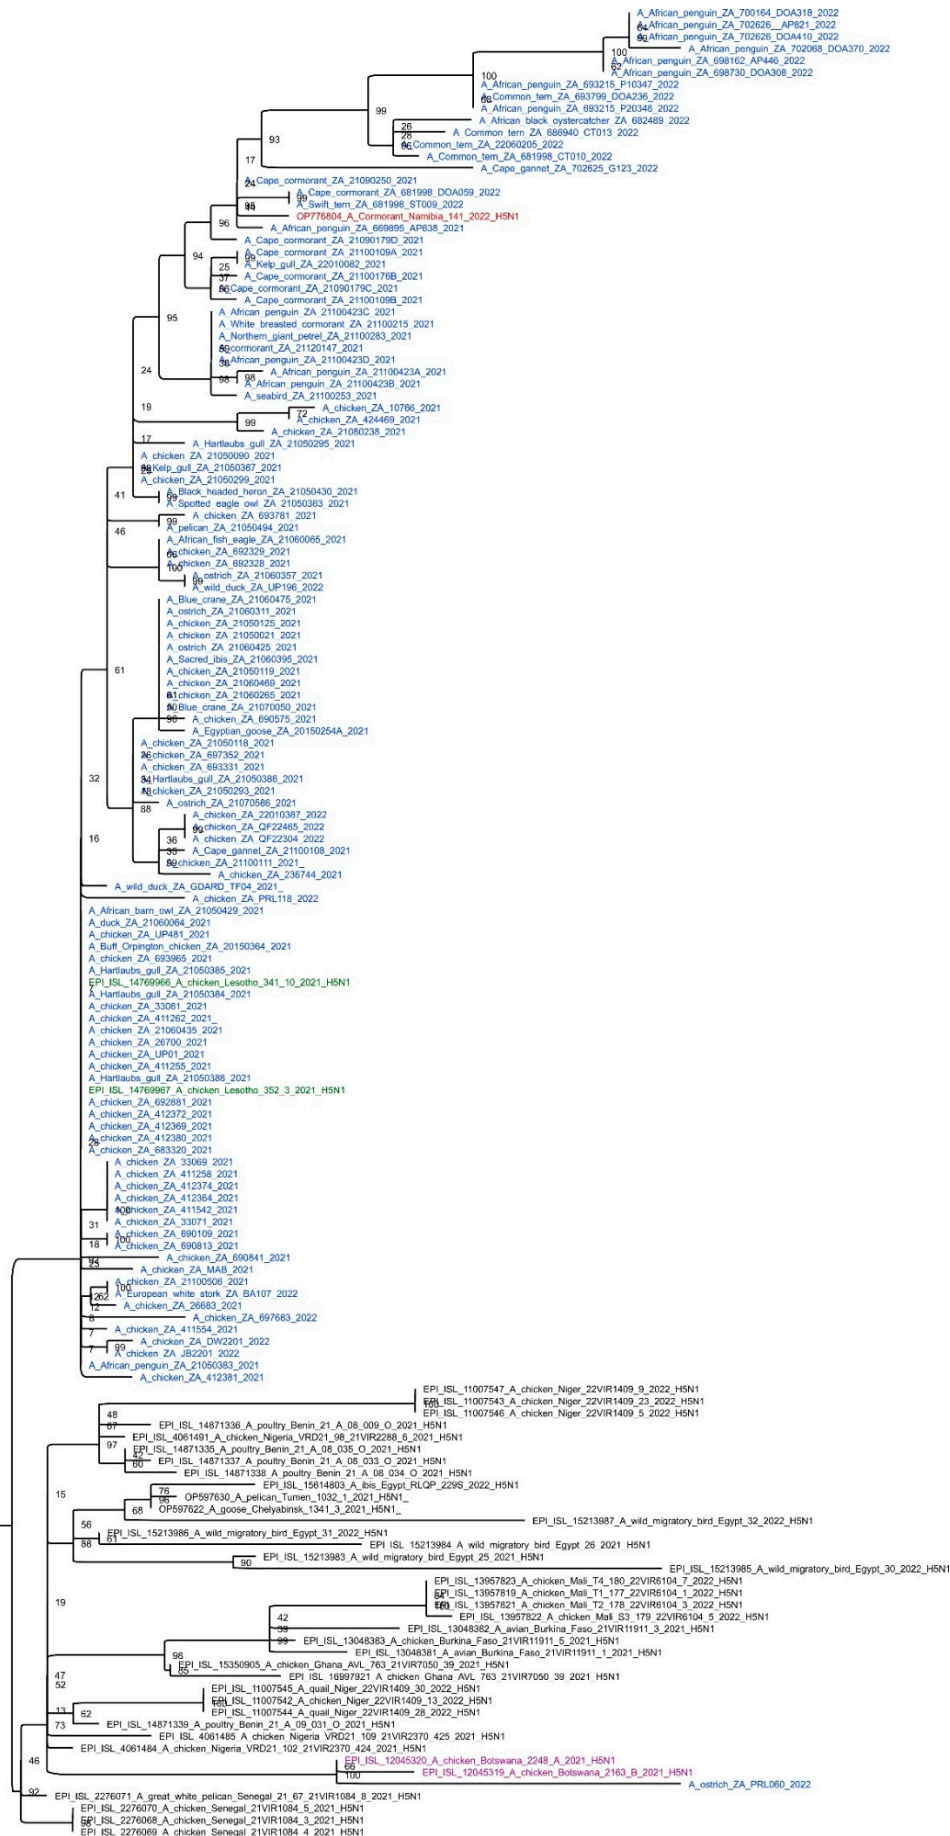

0.003

NA

**A**

African\_penguin\_ZA\_680162\_AP446\_2022  
African\_penguin\_ZA\_702626\_AP821\_2021  
African\_penguin\_ZA\_700164\_DOA318\_2022  
African\_penguin\_ZA\_703068\_DOA370\_2022  
African\_penguin\_ZA\_703039\_DOA410\_2022  
African\_penguin\_ZA\_696730\_DOA308\_2022  
A\_Common\_tern\_ZA\_693799\_DOA236\_2022  
African\_penguin\_ZA\_693215\_P10347\_2022  
African\_penguin\_ZA\_693215\_P20348\_2022  
A\_Common\_tern\_ZA\_689940\_CT013\_2022  
A\_Common\_tern\_ZA\_681998\_CT010\_2022  
A\_Common\_tern\_ZA\_22060305\_2022  
African\_black\_oystercatcher\_ZA\_682489\_2022  
African\_penguin\_ZA\_668895\_AP639\_2021  
chicken\_ZA\_21080238\_2021  
chicken\_ZA\_424469\_2021  
EPI\_ISL\_2276071\_A\_great\_white\_pelican\_Senegal\_21\_67\_21VIR1084\_8\_2021\_HSN1  
EPI\_ISL\_2276069\_A\_chicken\_Senegal\_21VIR1084\_4\_2021\_HSN1  
chicken\_ZA\_21050299\_2021  
chicken\_ZA\_21050293\_2021  
chicken\_ZA\_26700\_2021  
EPI\_ISL\_2276070\_A\_chicken\_Senegal\_21VIR1084\_5\_2021\_HSN1  
chicken\_ZA\_696341\_2021  
EPI\_ISL\_14769967\_A\_chicken\_Lesotho\_352\_3\_2021\_HSN1  
EPI\_ISL\_14769966\_A\_chicken\_Lesotho\_341\_10\_2021\_HSN1  
Hartlaub\_gull\_ZA\_21050306\_2021  
African\_penguin\_ZA\_2100423A\_2021  
Northern giant petrel\_ZA\_21100283\_2021  
White\_bellied\_cormorant\_ZA\_21100215\_2021  
African\_penguin\_ZA\_2100423C\_2021  
cormorant\_ZA\_21120147\_2021  
African\_penguin\_ZA\_2100423D\_2021  
African\_penguin\_ZA\_2100423B\_2021  
saabird\_ZA\_21102553\_2021  
Cape gannet\_ZA\_702625\_G123\_2022  
CP778805\_A\_Cormorant\_Namibia\_141\_2022\_HSN1  
Blue\_crane\_ZA\_21060475\_2021  
Black\_headed\_heron\_ZA\_21050430\_2021  
chicken\_ZA\_21060469\_2021  
Kelp\_gull\_ZA\_21050387\_2021  
chicken\_ZA\_UP481\_2021  
ostrich\_ZA\_21080311\_2021  
Cape\_cormorant\_ZA\_21090179C\_2021  
chicken\_ZA\_697352\_2021  
Blue\_crane\_ZA\_21070050\_2021  
Cape\_cormorant\_ZA\_21090179D\_2021  
chicken\_ZA\_690813\_2021  
Cape cormorant\_ZA\_21090250\_2021  
EPI\_ISL\_2276068\_A\_chicken\_Senegal\_21VIR1084\_3\_2021\_HSN1  
chicken\_ZA\_21060285\_2021  
Spotted eagle owl\_ZA\_21050363\_2021  
Cape\_cormorant\_ZA\_21100109B\_2021  
chicken\_ZA\_21050118\_2021  
ostrich\_ZA\_21070586\_2021  
chicken\_ZA\_21050119\_2021  
Hartlaub\_gull\_ZA\_21060286\_2021  
Sacred ibis\_ZA\_21060395\_2021  
chicken\_ZA\_21050060\_2021  
Cape\_cormorant\_ZA\_21100176B\_2021  
ostrich\_ZA\_21080425\_2021  
chicken\_ZA\_33081\_2021  
chicken\_ZA\_412372\_2021  
chicken\_ZA\_21050125\_2021  
Egyptian\_goose\_ZA\_21050254A\_2021  
chicken\_ZA\_690575\_2021  
chicken\_ZA\_21050021\_2021  
African barn owl\_ZA\_21050429\_2021  
chicken\_ZA\_693965\_2021  
Buff Oryzopsis chicken\_ZA\_21050364\_2021  
chicken\_ZA\_21090435\_2021  
chicken\_ZA\_692881\_2021  
chicken\_ZA\_UP01\_2021  
Hartlaub\_gull\_ZA\_21050385\_2021  
chicken\_ZA\_10769\_2021  
Hartlaub\_gull\_ZA\_21050386\_2021  
chicken\_ZA\_MAB\_2021  
Hartlaub\_gull\_ZA\_21050384\_2021  
duck\_ZA\_21060064\_2021  
African\_penguin\_ZA\_21050383\_2021  
chicken\_ZA\_692328\_2021  
pelican\_ZA\_21060404\_2021  
chicken\_ZA\_693781\_2021  
chicken\_ZA\_692329\_2021  
ostrich\_ZA\_21060357\_2021  
wild\_duck\_ZA\_UP196\_2022  
African\_fish\_eagle\_ZA\_21060065\_2021  
Cape cormorant\_ZA\_21100109A\_2021  
Kelp gull\_ZA\_22010062\_2022  
chicken\_ZA\_22010387\_2022  
chicken\_ZA\_QF22304\_2022  
chicken\_ZA\_QF22465\_2022  
chicken\_ZA\_21100111\_2021  
Cape gannet\_ZA\_21100108\_2021  
chicken\_ZA\_236744\_2021  
chicken\_ZA\_208863\_2021  
Cape\_cormorant\_ZA\_21100115\_D098\_2021  
chicken\_ZA\_33068\_2021  
chicken\_ZA\_412380\_2021  
chicken\_ZA\_412374\_2021  
chicken\_ZA\_683320\_2021  
chicken\_ZA\_412364\_2021  
chicken\_ZA\_411259\_2021  
chicken\_ZA\_411542\_2021  
chicken\_ZA\_411262\_2021  
chicken\_ZA\_411554\_2021  
wild duck\_ZA\_GDARD TF04\_2021  
chicken\_ZA\_412369\_2021  
chicken\_ZA\_33071\_2021  
chicken\_ZA\_DW2201\_2022  
chicken\_ZA\_B2201\_2022  
European white stork\_ZA\_BA107\_2022  
chicken\_ZA\_UP928\_2021  
chicken\_ZA\_PRL118\_2022  
chicken\_ZA\_411256\_2021  
chicken\_ZA\_412381\_2021  
EPI\_ISL\_2081045\_A\_white\_stork\_Poland\_MB391\_2021\_HSN1  
Cape\_cormorant\_ZA\_681998\_DOA059\_2022  
Swift tern\_ZA\_681998\_ST009\_2022  
EPI\_ISL\_12150664\_A\_goose\_Czech\_Republic\_785\_2022\_HSN1  
EPI\_ISL\_15614803\_A\_ibis\_Egypt\_RLPQ\_2299\_2022\_HSN1  
EPI\_ISL\_13199999\_A\_mute\_swan\_Czech\_Republic\_785\_2022\_HSN1  
LC718301\_A\_chicken\_Ivate\_TU16\_11\_12\_2022\_HSN1  
LC718229\_A\_white-fronted\_goose\_Ivate\_TU16\_74\_2022\_HSN1  
LC718291\_A\_jungle\_crow\_Hokkaido\_01048055\_2022\_HSN1  
07542\_A\_chicken\_Niger\_22VIR1409\_13\_2022\_HSN1  
07545\_A\_quail\_Niger\_22VIR1409\_30\_2022\_HSN1  
07544\_A\_quail\_Niger\_22VIR1409\_28\_2022\_HSN1  
113339\_A\_poultry\_Benin\_21\_A\_08\_031\_O\_2021\_HSN1  
Nigeria\_VRD21\_98\_21VIR2288\_6\_2021\_HSN1  
1484\_A\_chicken\_Nigeria\_VRD21\_102\_21VIR2370\_424\_2021\_HSN1  
45918\_A\_Dove\_Botswana\_2097\_2021\_HSN1  
A\_ostich\_ZA\_PRL060\_2022  
109\_21VIR2370\_425\_2021\_HSN1  
033\_O\_2021\_HSN1  
009\_O\_2021\_HSN1  
035\_O\_2021\_HSN1  
Nigeria\_VRD21\_37\_21VIR2288\_2\_2021\_HSN1  
EPI\_ISL\_11007543\_A\_chicken\_Niger\_22VIR1409\_23\_2022\_HSN1  
EPI\_ISL\_11007547\_A\_chicken\_Niger\_22VIR1409\_9\_2022\_HSN1  
EPI\_ISL\_11007546\_A\_chicken\_Niger\_22VIR1409\_5\_2022\_HSN1  
EPI\_ISL\_13957819\_A\_chicken\_Mali\_171\_22VIR08104\_1\_2022\_HSN1  
EPI\_ISL\_13957823\_A\_chicken\_Mali\_14\_180\_22VIR08104\_7\_2022\_HSN1  
EPI\_ISL\_13957822\_A\_chicken\_Mali\_151\_175\_22VIR08104\_5\_2022\_HSN1  
EPI\_ISL\_13957821\_A\_chicken\_Mali\_172\_178\_22VIR08104\_3\_2022\_HSN1  
EPI\_ISL\_13048381\_A\_avian\_Burkina\_Faso\_21VIR1911\_1\_2021\_HSN1  
EPI\_ISL\_13048383\_A\_avian\_Burkina\_Faso\_21VIR1911\_5\_2021\_HSN1  
EPI\_ISL\_13048382\_A\_avian\_Burkina\_Faso\_21VIR1911\_3\_2021\_HSN1  
EPI\_ISL\_16997921\_A\_chicken\_Ghana\_Avi\_763\_21VIR0750\_39\_2021\_HSN1  
EPI\_ISL\_16997921\_A\_chicken\_Ghana\_Avi\_763\_21VIR0750\_39\_2021\_HSN1  
EPI\_ISL\_13957819\_A\_chicken\_Mali\_171\_22VIR08104\_1\_2022\_HSN1  
EPI\_ISL\_13957823\_A\_chicken\_Mali\_14\_180\_22VIR08104\_7\_2022\_HSN1  
EPI\_ISL\_13957822\_A\_chicken\_Mali\_151\_175\_22VIR08104\_5\_2022\_HSN1  
EPI\_ISL\_13957821\_A\_chicken\_Mali\_172\_178\_22VIR08104\_3\_2022\_HSN1  
EPI\_ISL\_13048381\_A\_avian\_Burkina\_Faso\_21VIR1911\_1\_2021\_HSN1  
EPI\_ISL\_13048383\_A\_avian\_Burkina\_Faso\_21VIR1911\_5\_2021\_HSN1  
EPI\_ISL\_13048382\_A\_avian\_Burkina\_Faso\_21VIR1911\_3\_2021\_HSN1  
00905\_A\_chicken\_Ghana\_Avi\_763\_21VIR0750\_39\_2021\_HSN1  
EPI\_ISL\_16997921\_A\_chicken\_Ghana\_Avi\_763\_21VIR0750\_39\_2021\_HSN1

M

**Supplemental Figure S1a–h.** Maximum Likelihood phylogenetic trees of the individual genome segments of H5N1 HPAI viruses. All trees are midpoint-rooted and bootstrap values are indicated. South African viruses are highlighted in blue, Namibia in red, Lesotho in green, and Botswana in magenta.

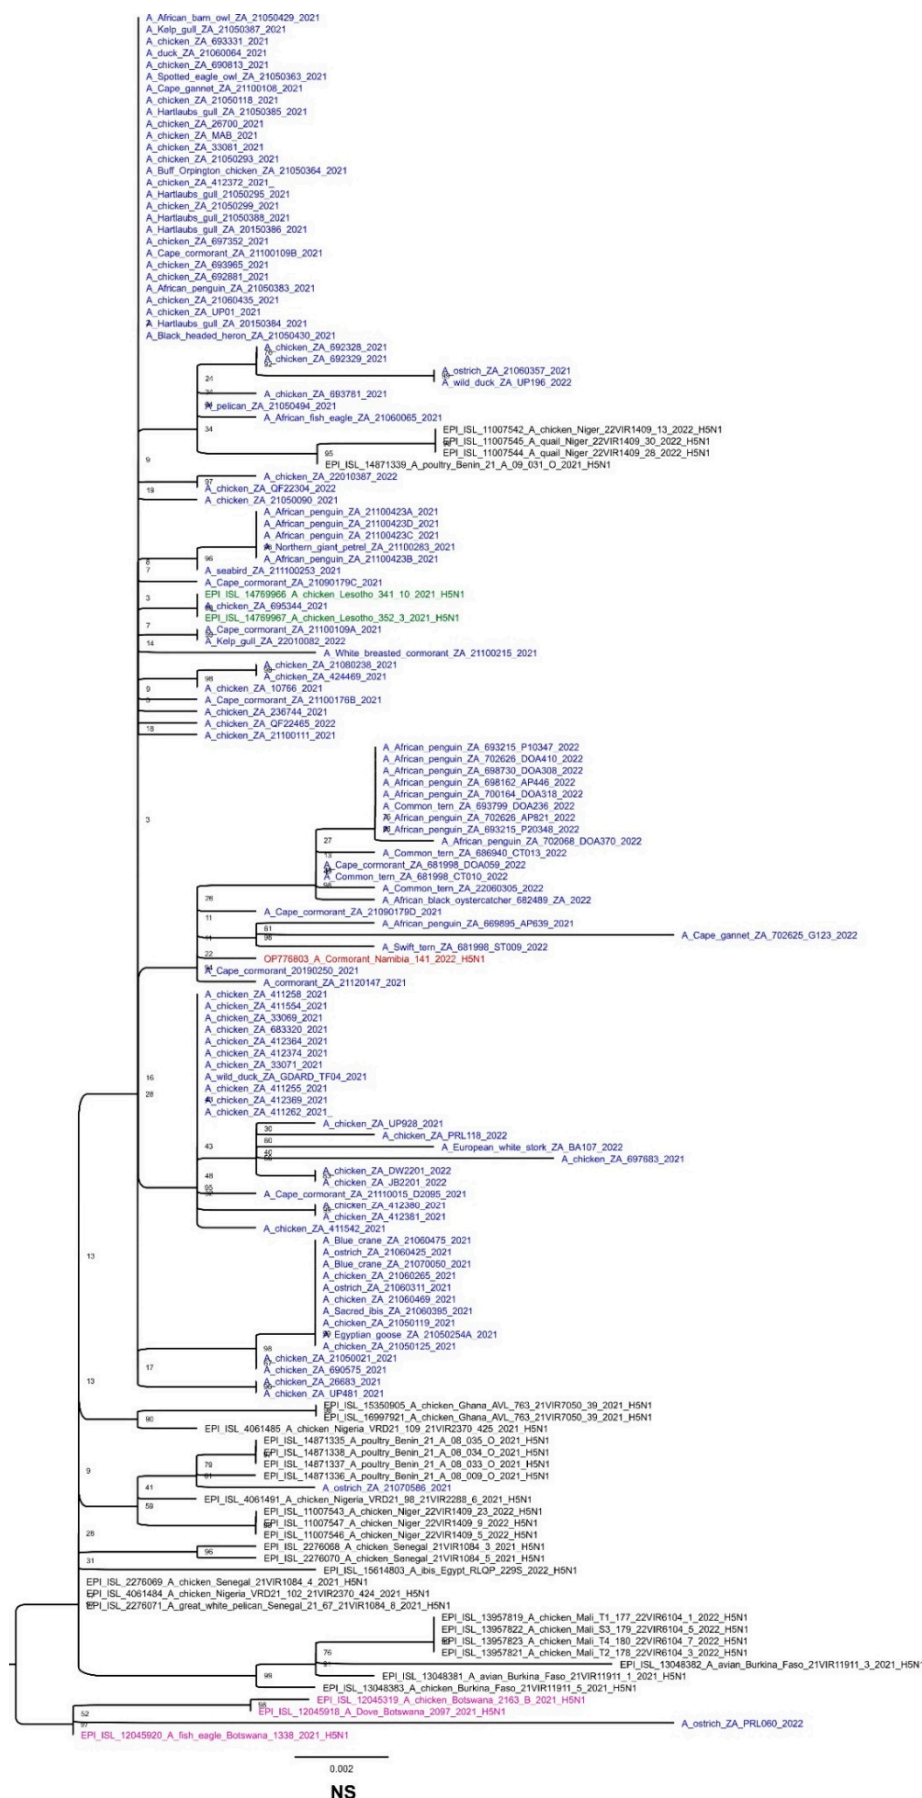

Supplement: s1 [file s1]
