# Supplementary material for: The Molecular Epidemiology of Clade 2.3.4.4B H5N1 High Pathogenicity Avian Influenza in Southern Africa, 2021–2022
Source: Viruses. 2023 Jun 16;15(6):1383. doi: 10.3390/v15061383 (PMC10302261; doi:10.3390/v15061383)
Supplement: Supplementary file 1 [file viruses-15-01383-s001.zip]

Archive with 8 entries (8 files):
- Enlarged view of Figure 3.pdf
- Enlarged view of Figure 4.pdf
- Enlarged view of Figure 5.pdf
- Enlarged view of Figure 7.pdf
- Figure S1a¿Ch.pdf
- Figure S2.pdf
- Figure S3a¿Ch.pdf
- Table S1.xlsx
