# Supplementary material for: The Molecular Epidemiology of Clade 2.3.4.4B H5N1 High Pathogenicity Avian Influenza in Southern Africa, 2021–2022
Source: Viruses. 2023 Jun 16;15(6):1383. doi: 10.3390/v15061383 (PMC10302261; doi:10.3390/v15061383)
Supplement: Supplementary file 1 [file viruses-15-01383-s001.zip › Table S1.xlsx]

## Sheet: Sheet1
		1	2	3	4	5	6	7	8	9	10	11	12	13	14	15	16	17	18	19	20	21	22	23	24	25	26	27	28	29	30	31	32	33	34	35	36	37	38	39	40	41	42	43	44	45	46	47	48
1	A_chicken_ZA_26683_2021_SA1
2	A_chicken_ZA_UP481_2021_SA1	0.00227331
3	A_chicken_Lesotho_3410_2021_H5N1_SA2	0.00365759	0.00431027
4	A_chicken_Lesotho_352_3_2021_H5N1_SA2	0.00382061	0.00447346	0.00016204
5	A_African_penguin_ZA_21050383_2021_SA3	0.00243564	0.00308689	0.00284244	0.00300523
6	A_Buff_Orpington_chicken_ZA_21050364_2021_SA3	0.00243564	0.00308689	0.00284244	0.00300523	0
7	A_chicken_ZA_693965_2021_SA3	0.00243564	0.00308689	0.00284244	0.00300523	0	0
8	A_chicken_ZA_UP01_2021_SA3	0.00243564	0.00308689	0.00284244	0.00300523	0	0	0
9	A_Hartlaubs_gull_ZA_21050388_2021_SA3	0.00243564	0.00308689	0.00284244	0.00300523	0	0	0	0
10	A_Hartlaubs_gull_ZA_21050384_2021_SA3	0.00259834	0.00324976	0.00300524	0.00316807	0.000162041	0.000162041	0.000162041	0.000162041	0.000162041
11	A_Hartlaubs_gull_ZA_21050385_2021_SA3	0.00267971	0.00333122	0.00308666	0.00324951	0.000243077	0.000243077	0.000243077	0.000243077	0.000243077	0.000405179
12	A_duck_ZA_21060064_2021_SA3	0.00276106	0.00341266	0.00308665	0.00324949	0.000324121	0.000324121	0.000324121	0.000324121	0.000324121	0.000486242	0.000567318
13	A_chicken_ZA_21060435_2021_SA3	0.00300543	0.00365733	0.00341261	0.00357554	0.000729539	0.000729539	0.000729539	0.000729539	0.000729539	0.000891769	0.000972901	0.00105404
14	A_chicken_ZA_26700_2021_SA3	0.00276146	0.0032502	0.00316852	0.0033314	0.000972982	0.000972982	0.000972982	0.000972982	0.000972982	0.00113529	0.00121646	0.00129763	0.00154131
15	A_chicken_ZA_MAB_2021_SA3	0.00373838	0.00439103	0.00414599	0.00430909	0.00145982	0.00145982	0.00145982	0.00145982	0.00145982	0.00162222	0.00170344	0.00178466	0.00202852	0.00227256
16	A_Black_headed_heron_ZA_21050430_2021_SA4	0.00324971	0.00390187	0.00357555	0.00373853	0.00243527	0.00243527	0.00243527	0.00243527	0.00243527	0.00259795	0.0026793	0.00243528	0.00300498	0.00276104	0.00373782
17	A_Spotted_eagle_owl_ZA_21050363_2021_SA4	0.00333115	0.0039834	0.00365704	0.00382003	0.0025166	0.0025166	0.0025166	0.0025166	0.0025166	0.00267929	0.00276066	0.00251661	0.00308638	0.00284242	0.0038193	8.10154e-05
18	A_chicken_ZA_21050090_2021_SA4	0.00324971	0.00390187	0.00357555	0.00373853	0.00243527	0.00243527	0.00243527	0.00243527	0.00243527	0.00259795	0.0026793	0.00243528	0.00300498	0.00276104	0.00373782	0.000810597	0.00089171
19	A_Hartlaubs_gull_ZA_21050295_2021_SA4	0.00316828	0.00382035	0.00349408	0.00365704	0.00235396	0.00235396	0.00235396	0.00235396	0.00235396	0.00251661	0.00259796	0.00235396	0.00292359	0.00267967	0.00365634	0.000729493	0.000810597	0.000567316
20	A_Kelp_gull_ZA_21050387_2021_SA4	0.00333163	0.00398396	0.00365756	0.00382058	0.00251696	0.00251696	0.00251696	0.00251696	0.00251696	0.00267967	0.00276105	0.00251697	0.00308682	0.00284282	0.00381985	0.000891836	0.000972971	0.000729597	0.000648492
21	A_chicken_ZA_21050299_2021_SA4	0.00382064	0.0044735	0.00414681	0.00430995	0.00300525	0.00300525	0.00300525	0.00300525	0.00300525	0.00316809	0.00324953	0.00300526	0.00357557	0.00333143	0.00430913	0.00137882	0.00146001	0.00137882	0.00129763	0.00146022
22	A_African_penguin_ZA_21100423A_2021_SA4	0.00520795	0.00569875	0.0055348	0.00569827	0.00439057	0.00439057	0.00439057	0.00439057	0.00439057	0.00455375	0.00463537	0.00439059	0.00496216	0.00471763	0.00569719	0.00276047	0.00284183	0.00276047	0.00267912	0.00284224	0.00316786
23	A_African_penguin_ZA_21100423C_2021_SA4	0.00504423	0.00553487	0.0052076	0.00537098	0.00422715	0.00422715	0.00422715	0.00422715	0.00422715	0.00439028	0.00447187	0.00422717	0.00479855	0.00455408	0.00553335	0.0025976	0.00267893	0.0025976	0.00251627	0.00267931	0.00300484	0.000972901
24	A_African_penguin_ZA_21100423D_2021_SA4	0.0049626	0.00545317	0.00528931	0.00545271	0.00414563	0.00414563	0.00414563	0.00414563	0.00414563	0.00430873	0.00439031	0.00414564	0.00471695	0.0044725	0.00545167	0.00251628	0.00259761	0.00251628	0.00243496	0.00259798	0.00292346	0.000891777	0.000243076
25	A_Northern_giant_petrel_ZA_21100283_2021_SA4	0.0049626	0.00545317	0.00528931	0.00545271	0.00414563	0.00414563	0.00414563	0.00414563	0.00414563	0.00430873	0.00439031	0.00414564	0.00471695	0.0044725	0.00545167	0.00251628	0.00259761	0.00251628	0.00243496	0.00259798	0.00292346	0.000891777	0.000243076	0
26	A_African_penguin_ZA_21100423B_2021_SA4	0.00488163	0.00553566	0.00520834	0.00537175	0.00406466	0.00406466	0.00406466	0.00406466	0.00406466	0.00422777	0.00430935	0.00406468	0.00463599	0.00439153	0.00537073	0.0024353	0.00251663	0.0024353	0.00235398	0.00251699	0.00284248	0.00097304	0.00113527	0.00105412	0.00105412
27	A_seabird_ZA_21110253_2021_SA4	0.00561658	0.00610771	0.00594363	0.0061072	0.00479861	0.00479861	0.00479861	0.00479861	0.00479861	0.00496189	0.00504355	0.00479863	0.00537058	0.00512592	0.00610604	0.00316741	0.00324882	0.00316741	0.00308601	0.00324929	0.00357512	0.00170364	0.00154109	0.0014599	0.0014599	0.00186624
28	A_White_breasted_cormorant_ZA_21100215_2021_SA4	0.00504425	0.00553489	0.005371	0.00553443	0.0040641	0.0040641	0.0040641	0.0040641	0.0040641	0.00422718	0.00430875	0.00406411	0.00463535	0.00439092	0.00536998	0.00259761	0.00267894	0.00259761	0.00251628	0.00267932	0.00300485	0.00211008	0.0017849	0.00170367	0.00170367	0.00227283	0.00251665
29	A_chicken_ZA_21080238_2021_SA4	0.00561854	0.00627354	0.00594571	0.00610934	0.00480028	0.00480028	0.00480028	0.00480028	0.00480028	0.00496362	0.00504532	0.0048003	0.00537245	0.00512771	0.00594458	0.00316852	0.00324996	0.00300567	0.00292426	0.00308753	0.0037394	0.00512665	0.00496295	0.00488132	0.00488132	0.00480034	0.00553526	0.00496297
30	A_chicken_ZA_424469_2021_SA4	0.00586349	0.0065187	0.00619075	0.00635443	0.00504493	0.00504493	0.00504493	0.00504493	0.00504493	0.00520832	0.00529004	0.00504496	0.00561729	0.0053725	0.00618957	0.00341263	0.0034941	0.00324974	0.0031683	0.00333166	0.00398373	0.00537139	0.00520762	0.00512596	0.00512596	0.005045	0.00578012	0.00520764	0.000405204
31	A_African_fish_eagle_ZA_21060065_2021_SA5	0.00357567	0.00422819	0.00382014	0.00398318	0.00276074	0.00276074	0.00276074	0.00276074	0.00276074	0.0029235	0.0030049	0.00308628	0.00333076	0.00308672	0.00406397	0.00276088	0.00284225	0.00276088	0.00267952	0.00284266	0.00333123	0.00471735	0.00455381	0.00447224	0.00447224	0.00439127	0.00512562	0.00455383	0.00496404	0.00520876
32	A_chicken_ZA_692329_2021_SA5	0.00333119	0.0038204	0.00373857	0.00390159	0.00251663	0.00251663	0.00251663	0.00251663	0.00251663	0.00267932	0.00276069	0.00284205	0.00308641	0.00284245	0.00381935	0.0023541	0.00243543	0.0023541	0.00227279	0.00243577	0.00292404	0.00430928	0.00414587	0.00406435	0.00406435	0.00398338	0.00471729	0.00414589	0.00455567	0.00480026	0.00121646
33	A_chicken_ZA_693781_2021_SA5	0.00333168	0.00398403	0.00373912	0.00390216	0.002517	0.002517	0.002517	0.002517	0.002517	0.00267972	0.0027611	0.00284246	0.00308687	0.00284287	0.00381991	0.00251713	0.00259848	0.00251713	0.00243578	0.00259885	0.00308731	0.00447309	0.00430961	0.00422806	0.00422806	0.00414707	0.00488126	0.00430962	0.00488297	0.00512769	0.00186644	0.00162266
34	A_pelican_ZA_21050494_2021_SA5	0.00300567	0.00365762	0.00341288	0.00357582	0.00219152	0.00219152	0.00219152	0.00219152	0.00219152	0.00235414	0.00243547	0.0025168	0.00276104	0.00251716	0.00349368	0.00219163	0.00227294	0.00219163	0.00211033	0.00227326	0.00276144	0.00414643	0.00398306	0.00390156	0.00390156	0.00382058	0.00455437	0.00398308	0.00455596	0.00480057	0.00154134	0.00129771	0.000324147
35	A_ostrich_ZA_21060357_2021_SA5	0.00390167	0.00455453	0.0043094	0.00447256	0.00308627	0.00308627	0.00308627	0.00308627	0.00308627	0.00324911	0.00333055	0.00341197	0.00365659	0.00341246	0.00439014	0.00308643	0.00316784	0.00308643	0.00300503	0.00316829	0.00365711	0.00504389	0.00488025	0.00479865	0.00479865	0.00471768	0.00545236	0.00488027	0.00529082	0.00553564	0.00178493	0.00146002	0.00219156	0.00186628
36	A_wild_duck_ZA_UP196_2022_SA7	0.00463573	0.00528937	0.00504391	0.00520725	0.00381929	0.00381929	0.00381929	0.00381929	0.00381929	0.00398231	0.00406384	0.00414535	0.00422717	0.00414594	0.0051246	0.00365651	0.003738	0.00365651	0.00357504	0.00373853	0.00422777	0.00561573	0.00545191	0.00537023	0.00537023	0.00528928	0.00602455	0.00528855	0.00586307	0.00610805	0.00267917	0.0023538	0.00308645	0.00276067	0.000891702
37	A_Blue_crane_ZA_21060475_2021_SA5	0.0030055	0.00365742	0.00341269	0.00357563	0.00219139	0.00219139	0.00219139	0.00219139	0.00219139	0.00235401	0.00243534	0.00251666	0.00276089	0.00251702	0.00349349	0.00219151	0.00227281	0.00219151	0.00211021	0.00227313	0.00276128	0.0041462	0.00398284	0.00390134	0.00390134	0.00382036	0.00455411	0.00398286	0.00455571	0.0048003	0.00251687	0.00227284	0.00227317	0.0019478	0.00284231	0.00357512
38	A_chicken_ZA_21050119_2021_SA5	0.0030055	0.00365742	0.00341269	0.00357563	0.00219139	0.00219139	0.00219139	0.00219139	0.00219139	0.00235401	0.00243534	0.00251666	0.00276089	0.00251702	0.00349349	0.00219151	0.00227281	0.00219151	0.00211021	0.00227313	0.00276128	0.0041462	0.00398284	0.00390134	0.00390134	0.00382036	0.00455411	0.00398286	0.00455571	0.0048003	0.00251687	0.00227284	0.00227317	0.0019478	0.00284231	0.00357512	0
39	A_chicken_ZA_21050125_2021_SA5	0.0030055	0.00365742	0.00341269	0.00357563	0.00219139	0.00219139	0.00219139	0.00219139	0.00219139	0.00235401	0.00243534	0.00251666	0.00276089	0.00251702	0.00349349	0.00219151	0.00227281	0.00219151	0.00211021	0.00227313	0.00276128	0.0041462	0.00398284	0.00390134	0.00390134	0.00382036	0.00455411	0.00398286	0.00455571	0.0048003	0.00251687	0.00227284	0.00227317	0.0019478	0.00284231	0.00357512	0	0
40	A_chicken_ZA_21060265_2021_SA5	0.0030055	0.00365742	0.00341269	0.00357563	0.00219139	0.00219139	0.00219139	0.00219139	0.00219139	0.00235401	0.00243534	0.00251666	0.00276089	0.00251702	0.00349349	0.00219151	0.00227281	0.00219151	0.00211021	0.00227313	0.00276128	0.0041462	0.00398284	0.00390134	0.00390134	0.00382036	0.00455411	0.00398286	0.00455571	0.0048003	0.00251687	0.00227284	0.00227317	0.0019478	0.00284231	0.00357512	0	0	0
41	A_chicken_ZA_21060469_2021_SA5	0.0030055	0.00365742	0.00341269	0.00357563	0.00219139	0.00219139	0.00219139	0.00219139	0.00219139	0.00235401	0.00243534	0.00251666	0.00276089	0.00251702	0.00349349	0.00219151	0.00227281	0.00219151	0.00211021	0.00227313	0.00276128	0.0041462	0.00398284	0.00390134	0.00390134	0.00382036	0.00455411	0.00398286	0.00455571	0.0048003	0.00251687	0.00227284	0.00227317	0.0019478	0.00284231	0.00357512	0	0	0	0
42	A_ostrich_ZA_21060311_2021_SA5	0.0030055	0.00365742	0.00341269	0.00357563	0.00219139	0.00219139	0.00219139	0.00219139	0.00219139	0.00235401	0.00243534	0.00251666	0.00276089	0.00251702	0.00349349	0.00219151	0.00227281	0.00219151	0.00211021	0.00227313	0.00276128	0.0041462	0.00398284	0.00390134	0.00390134	0.00382036	0.00455411	0.00398286	0.00455571	0.0048003	0.00251687	0.00227284	0.00227317	0.0019478	0.00284231	0.00357512	0	0	0	0	0
43	A_Blue_crane_ZA_21070050_2021_SA5	0.00308692	0.00373892	0.00349415	0.00365711	0.00227269	0.00227269	0.00227269	0.00227269	0.00227269	0.00243533	0.00251667	0.002598	0.00284226	0.00259837	0.00357495	0.00227281	0.00235412	0.00227281	0.00219151	0.00235446	0.00284267	0.00422775	0.00406437	0.00398286	0.00398286	0.00390188	0.00463572	0.00406439	0.00463734	0.00488196	0.00259821	0.00235415	0.0023545	0.00202908	0.00292369	0.00365659	8.10154e-05	8.10154e-05	8.10154e-05	8.10154e-05	8.10154e-05	8.10154e-05
44	A_ostrich_ZA_21060425_2021_SA5	0.00292409	0.00357591	0.00333122	0.00349414	0.0021101	0.0021101	0.0021101	0.0021101	0.0021101	0.00227269	0.00235401	0.00243532	0.00267952	0.00243567	0.00341203	0.00211021	0.0021915	0.00211021	0.00202892	0.00219181	0.0026799	0.00406464	0.00390131	0.00381982	0.00381982	0.00373884	0.0044725	0.00390133	0.00447407	0.00471864	0.00243552	0.00219152	0.00219185	0.00186652	0.00276092	0.00349364	8.10157e-05	8.10157e-05	8.10157e-05	8.10157e-05	8.10157e-05	8.10157e-05	0.000162041
45	A_chicken_ZA_21050021_2021_SA5	0.00292389	0.00357567	0.003331	0.0034939	0.00210996	0.00210996	0.00210996	0.00210996	0.00210996	0.00227254	0.00235385	0.00243516	0.00267933	0.0024355	0.0034118	0.00211006	0.00219135	0.00211006	0.00202879	0.00219166	0.00267972	0.00406437	0.00390105	0.00381956	0.00381956	0.00373859	0.0044722	0.00390106	0.00447376	0.00471832	0.00243536	0.00219138	0.0021917	0.0018664	0.00276074	0.0034934	8.10212e-05	8.10212e-05	8.10212e-05	8.10212e-05	8.10212e-05	8.10212e-05	0.000162052	0.000162053
46	A_chicken_ZA_21050118_2021_SA5	0.00267973	0.00333125	0.00308668	0.00324953	0.00186615	0.00186615	0.00186615	0.00186615	0.00186615	0.00202867	0.00210996	0.00219123	0.0024353	0.00219154	0.0031675	0.00186624	0.0019475	0.00186624	0.001785	0.00194778	0.00243565	0.00381979	0.00365654	0.00357509	0.00357509	0.00349411	0.00422747	0.00365656	0.00422894	0.00447343	0.00219141	0.00194753	0.00194781	0.00162265	0.00251667	0.00324907	0.000648538	0.000648538	0.000648538	0.000648538	0.000648538	0.000648538	0.000729649	0.000729652	0.000567396
47	A_chicken_ZA_21050293_2021_SA5	0.0028423	0.00349395	0.00324933	0.0034122	0.00202854	0.00202854	0.00202854	0.00202854	0.00202854	0.00219109	0.00227239	0.00235368	0.0025978	0.0022727	0.00333013	0.00202864	0.00210991	0.00202864	0.00194738	0.00211021	0.00259817	0.00398256	0.00381927	0.0037378	0.0037378	0.00365683	0.00439031	0.00381929	0.00439185	0.00463636	0.00235387	0.00210994	0.00211025	0.00178502	0.00267919	0.00341171	0.000810718	0.000810718	0.000810718	0.000810718	0.000810718	0.000810718	0.000891844	0.000891847	0.000729551	0.000486276
48	A_chicken_ZA_693331_2021_SA5	0.00316835	0.00382044	0.00357564	0.00373862	0.00235401	0.00235401	0.00235401	0.00235401	0.00235401	0.00251667	0.00259802	0.00267936	0.00292366	0.00267974	0.00365643	0.00235413	0.00243546	0.00235413	0.00227282	0.0024358	0.00292407	0.00430933	0.00414592	0.0040644	0.0040644	0.00398343	0.00471735	0.00414594	0.004719	0.00496364	0.00267958	0.00243548	0.00243584	0.00211038	0.0030051	0.00373809	0.00113544	0.00113544	0.00113544	0.00113544	0.00113544	0.00113544	0.00121662	0.00121662	0.0010542	0.000810773	0.000972982
49	A_chicken_ZA_697352_2021_SA5	0.00267973	0.00333125	0.00308668	0.00324953	0.00186615	0.00186615	0.00186615	0.00186615	0.00186615	0.00202867	0.00210996	0.00219123	0.0024353	0.00219154	0.0031675	0.00186624	0.0019475	0.00186624	0.001785	0.00194778	0.00243565	0.00381979	0.00365654	0.00357509	0.00357509	0.00349411	0.00422747	0.00365656	0.00422894	0.00447343	0.00219141	0.00194753	0.00194781	0.00162265	0.00251667	0.00324907	0.00146012	0.00146012	0.00146012	0.00146012	0.00146012	0.00146012	0.00154133	0.00137891	0.00137882	0.00113529	0.00129754	0.00162256
50	A_chicken_ZA_690575_2021_SA5	0.00398319	0.00463614	0.00439098	0.00455415	0.00316768	0.00316768	0.00316768	0.00316768	0.00316768	0.00333053	0.00341199	0.00349342	0.00373807	0.00349392	0.00447171	0.00316784	0.00324926	0.00316784	0.00308643	0.00324972	0.0037386	0.00512555	0.00496189	0.00488027	0.00488027	0.00479931	0.00553407	0.00496191	0.00553601	0.0057809	0.00349371	0.0032493	0.00324978	0.00292385	0.00381962	0.0045535	0.00113528	0.00113528	0.00113528	0.00113528	0.00113528	0.00113528	0.00121644	0.00121645	0.00105405	0.00162254	0.00178489	0.00211023
51	A_chicken_ZA_692881_2021_SA6	0.00259852	0.00325	0.00300545	0.00316829	0.000162053	0.000162053	0.000162053	0.000162053	0.000162053	0.000324145	0.000405208	0.000486276	0.000891833	0.00113537	0.00162234	0.00243544	0.00251677	0.00243544	0.00235411	0.00251713	0.00300545	0.00439087	0.00422743	0.00414591	0.00414591	0.00406493	0.00479893	0.00406437	0.00480061	0.00504528	0.00276092	0.0025168	0.00251717	0.00219166	0.00308648	0.00381955	0.00219154	0.00219154	0.00219154	0.00219154	0.00219154	0.00219154	0.00227285	0.00211024	0.0021101	0.00186627	0.00202867	0.00219124
52	A_chicken_ZA_22010387_2022_SA5	0.00561897	0.00610944	0.0058643	0.00602793	0.00480065	0.00480065	0.00480065	0.00480065	0.00480065	0.004964	0.0050457	0.00512737	0.00537286	0.0051281	0.00610864	0.00480089	0.00488256	0.00480089	0.00471924	0.00488326	0.00537363	0.00676475	0.00660047	0.00651862	0.00651862	0.00643765	0.00717451	0.0066005	0.00717703	0.00742254	0.0051278	0.00488262	0.00488333	0.0045563	0.00545468	0.00619075	0.00357706	0.00357706	0.00357706	0.00357706	0.00357706	0.00357706	0.00365857	0.00365859	0.0034953	0.00325083	0.00341357	0.00374012
53	A_chicken_ZA_QF22304_2022_SA5	0.00545544	0.00594581	0.00570072	0.0058643	0.00463735	0.00463735	0.00463735	0.00463735	0.00463735	0.00480067	0.00488235	0.004964	0.00520942	0.00496471	0.00594503	0.00463759	0.00471924	0.00463759	0.00455596	0.00471991	0.00521016	0.00660095	0.00643672	0.00635489	0.00635489	0.00627391	0.00701061	0.00643675	0.00701307	0.00725853	0.00496441	0.00471929	0.00471999	0.00439305	0.00529122	0.00602711	0.00341405	0.00341405	0.00341405	0.00341405	0.00341405	0.00341405	0.00349555	0.00349556	0.00333233	0.00308792	0.00325063	0.00357707
54	A_chicken_ZA_QF22465_2022_SA5	0.00545509	0.00594543	0.00586393	0.00602754	0.00480034	0.00480034	0.00480034	0.00480034	0.00480034	0.00496368	0.00504538	0.00512704	0.00537252	0.00512777	0.00610825	0.00480059	0.00488225	0.00480059	0.00471894	0.00488295	0.00537329	0.00676432	0.00660005	0.0065182	0.0065182	0.00643724	0.00717405	0.00660008	0.00717657	0.00742207	0.00512747	0.00488231	0.00488302	0.00455601	0.00545434	0.00619036	0.00357683	0.00357683	0.00357683	0.00357683	0.00357683	0.00357683	0.00365834	0.00365836	0.00349508	0.00325063	0.00341335	0.00373988
55	A_Cape_gannet_ZA_21100108_2021_SA5	0.004229	0.0047184	0.00463704	0.00480032	0.0034129	0.0034129	0.0034129	0.0034129	0.0034129	0.00357587	0.00365737	0.00373886	0.00398368	0.00373939	0.00471778	0.00341308	0.00349455	0.00341308	0.00333162	0.00349505	0.00398425	0.00537209	0.0052083	0.00512663	0.00512663	0.00504566	0.00578088	0.00520832	0.0057829	0.00602793	0.00373917	0.0034946	0.00349511	0.00316896	0.00406529	0.00479964	0.00219212	0.00219212	0.00219212	0.00219212	0.00219212	0.00219212	0.00227345	0.00227346	0.00211066	0.00186677	0.00202921	0.00235479
56	A_chicken_ZA_236744_2021_SA5	0.0043916	0.00504508	0.00463577	0.00479901	0.00357539	0.00357539	0.00357539	0.00357539	0.00357539	0.00373837	0.00381988	0.00381987	0.00414623	0.00390193	0.00488041	0.00333118	0.00341263	0.00333118	0.00324974	0.00341312	0.00390219	0.00528968	0.00512594	0.00504429	0.00504429	0.00496333	0.00569837	0.00512596	0.00570036	0.00594533	0.0039017	0.0036571	0.00365763	0.00333143	0.00422786	0.00496228	0.00235448	0.00235448	0.00235448	0.00235448	0.00235448	0.00235448	0.00243581	0.00243582	0.00227299	0.00202907	0.00219152	0.00251717
56	A_African_barn_owl_ZA_21050429_2021_SA8	0.00300543	0.00365733	0.00333115	0.00349407	0.00202876	0.00202876	0.00202876	0.00202876	0.00202876	0.00219133	0.00227264	0.00202877	0.00259809	0.00251696	0.00333049	0.000729496	0.0008106	0.00121627	0.00113512	0.00129762	0.0017849	0.00316741	0.00300441	0.00292304	0.00292304	0.00284207	0.00357461	0.00300442	0.00357585	0.00382009	0.00300506	0.00259813	0.00276125	0.00243561	0.00333073	0.00390103	0.00243547	0.00243547	0.00243547	0.00243547	0.00243547	0.00243547	0.00251681	0.00235414	0.00235398	0.00211007	0.00227251	0.00259816
58	A_ostrich_ZA_21070586_2021_SA9	0.00422787	0.00488109	0.00479908	0.00496236	0.00357493	0.00357493	0.00357493	0.00357493	0.00357493	0.00373789	0.0038194	0.00390088	0.00414571	0.00390144	0.00487979	0.00341171	0.00349316	0.00341171	0.00333028	0.00349365	0.00398265	0.00536994	0.00520621	0.00512458	0.00512458	0.00504363	0.00577856	0.00520623	0.00578058	0.00602551	0.0039012	0.00365663	0.00365717	0.00333101	0.00422732	0.00496165	0.00316794	0.00316794	0.00316794	0.00316794	0.00316794	0.00316794	0.00324937	0.00308651	0.00308631	0.00284212	0.00300469	0.00316793
59	A_chicken_ZA_33069_2021_SA10	0.00463675	0.00529053	0.00504502	0.00520838	0.00267956	0.00267956	0.00267956	0.00267956	0.00267956	0.00284231	0.0029237	0.00300509	0.00324954	0.00284271	0.00398272	0.00463605	0.00471767	0.00463605	0.00455444	0.00471834	0.00520843	0.00659874	0.00643457	0.00635277	0.00635277	0.00627182	0.00700827	0.00627094	0.00684686	0.00709219	0.00479947	0.00455449	0.00471842	0.00439158	0.00512609	0.00586156	0.00439134	0.00439134	0.00439134	0.00439134	0.00439134	0.00439134	0.00447293	0.00430974	0.00430945	0.00406476	0.00422759	0.00455455
60	A_chicken_ZA_33071_2021_SA10	0.00463675	0.00529053	0.00504502	0.00520838	0.00267956	0.00267956	0.00267956	0.00267956	0.00267956	0.00284231	0.0029237	0.00300509	0.00324954	0.00284271	0.00398272	0.00463605	0.00471767	0.00463605	0.00455444	0.00471834	0.00520843	0.00659874	0.00643457	0.00635277	0.00635277	0.00627182	0.00700827	0.00627094	0.00684686	0.00709219	0.00479947	0.00455449	0.00471842	0.00439158	0.00512609	0.00586156	0.00439134	0.00439134	0.00439134	0.00439134	0.00439134	0.00439134	0.00447293	0.00430974	0.00430945	0.00406476	0.00422759	0.00455455
61	A_chicken_ZA_411258_2021_SA10	0.00471836	0.00537222	0.00512667	0.00529006	0.00276091	0.00276091	0.00276091	0.00276091	0.00276091	0.00292368	0.00300509	0.00308648	0.00333097	0.0029241	0.00406423	0.00471765	0.00479927	0.00471765	0.00463603	0.00479996	0.00529011	0.00668058	0.00651639	0.00643457	0.00643457	0.00635363	0.00709016	0.00635274	0.00692876	0.00717411	0.00488109	0.00463608	0.00480004	0.00447316	0.00520774	0.0059433	0.00447291	0.00447291	0.00447291	0.00447291	0.00447291	0.00447291	0.00455451	0.00439131	0.00439101	0.00414628	0.00430913	0.00463614
62	A_chicken_ZA_412364_2021_SA10	0.00463673	0.0052905	0.005045	0.00520836	0.00267955	0.00267955	0.00267955	0.00267955	0.00267955	0.0028423	0.00292369	0.00300507	0.00324953	0.0028427	0.0039827	0.00463603	0.00471765	0.00463603	0.00455442	0.00471832	0.00520841	0.00659871	0.00643455	0.00635274	0.00635274	0.00627179	0.00700824	0.00627092	0.00684683	0.00709216	0.00479945	0.00455448	0.0047184	0.00439157	0.00512607	0.00586153	0.00439132	0.00439132	0.00439132	0.00439132	0.00439132	0.00439132	0.00447291	0.00430973	0.00430944	0.00406474	0.00422757	0.00455453
63	A_chicken_ZA_412374_2021_SA11	0.00406555	0.00471871	0.00447346	0.00463669	0.0024355	0.0024355	0.0024355	0.0024355	0.0024355	0.00259819	0.00267956	0.00276091	0.00300526	0.00259856	0.00373818	0.00406493	0.00414648	0.00406493	0.0039834	0.00414707	0.00463673	0.00602584	0.00586186	0.00578012	0.00578012	0.00569916	0.00643501	0.00569837	0.00627354	0.0065187	0.00422819	0.00398344	0.00414714	0.00382064	0.00455453	0.00528937	0.00382043	0.00382043	0.00382043	0.00382043	0.00382043	0.00382043	0.00390195	0.0037389	0.00373865	0.00349417	0.00365689	0.00398349
64	A_chicken_ZA_411262_2021_SA10	0.00414744	0.00480074	0.00455543	0.0047187	0.00219172	0.00219172	0.00219172	0.00219172	0.00219172	0.00235436	0.0024357	0.00251703	0.00276129	0.00235469	0.003494	0.00414681	0.00422837	0.00414681	0.00406526	0.00422898	0.00471873	0.00610813	0.0059441	0.00586235	0.00586235	0.00578138	0.00651738	0.00578058	0.00643778	0.006683	0.00447329	0.00422843	0.00422905	0.00390247	0.00479977	0.00553493	0.00390226	0.00390226	0.00390226	0.00390226	0.00390226	0.00390226	0.00398379	0.00382071	0.00382046	0.00357592	0.00373868	0.00406535
65	A_chicken_ZA_683320_2021_SA10	0.00390247	0.00455547	0.00431029	0.00447348	0.0019477	0.0019477	0.0019477	0.0019477	0.0019477	0.00211026	0.00219157	0.00227286	0.00251701	0.00211057	0.0032494	0.00390188	0.00398341	0.00390188	0.00382036	0.00398398	0.00447352	0.0058623	0.00569837	0.00561664	0.00561664	0.00553568	0.00627137	0.00553491	0.00627356	0.00651872	0.00422821	0.00398346	0.00398404	0.00365763	0.00455455	0.00528939	0.00365743	0.00365743	0.00365743	0.00365743	0.00365743	0.00365743	0.00373893	0.00357592	0.00357568	0.00333126	0.00349396	0.00382046
66	A_chicken_ZA_411255_2021_SA10	0.00455542	0.00520915	0.00504534	0.00520872	0.00267973	0.00267973	0.00267973	0.00267973	0.00267973	0.00284249	0.00292389	0.00300528	0.00324975	0.00284289	0.00398297	0.00463634	0.00471796	0.00463634	0.00455473	0.00471864	0.00520876	0.00659916	0.00643498	0.00635317	0.00635317	0.00627221	0.00700871	0.00627134	0.00701117	0.00725656	0.00496307	0.00471802	0.00471871	0.00439186	0.00528979	0.00602548	0.00439162	0.00439162	0.00439162	0.00439162	0.00439162	0.00439162	0.00447322	0.00431002	0.00430973	0.00406502	0.00422786	0.00455484
67	A_chicken_ZA_33081_2021_SA10	0.00414712	0.00480038	0.00455509	0.00471834	0.00219155	0.00219155	0.00219155	0.00219155	0.00219155	0.00235418	0.00243551	0.00251684	0.00276109	0.0025172	0.00349374	0.00382036	0.00390188	0.00382036	0.00373886	0.00390244	0.00439192	0.00578053	0.00561662	0.00553491	0.00553491	0.00545395	0.00618955	0.00545319	0.00619172	0.00643685	0.00430978	0.00390193	0.0040656	0.00373914	0.00463616	0.00537109	0.00373893	0.00373893	0.00373893	0.00373893	0.00373893	0.00373893	0.00382044	0.00365742	0.00365717	0.00341272	0.00357543	0.00390198
68	A_chicken_ZA_412372_2021_SA10	0.00406558	0.00471875	0.0044735	0.00463673	0.00211026	0.00211026	0.00211026	0.00211026	0.00211026	0.00227287	0.0023542	0.00243551	0.00267973	0.00243586	0.0034123	0.0039019	0.00398343	0.0039019	0.00382038	0.003984	0.00447353	0.00586232	0.00569839	0.00561667	0.00561667	0.0055357	0.00627139	0.00553493	0.00627359	0.00651875	0.00422823	0.00398348	0.00398406	0.00365765	0.00455457	0.00528941	0.00365744	0.00365744	0.00365744	0.00365744	0.00365744	0.00365744	0.00373895	0.00357594	0.0035757	0.00333127	0.00349397	0.00382047
69	A_chicken_ZA_412380_2021_SA10	0.00496475	0.00561906	0.00537333	0.00553682	0.00300593	0.00300593	0.00300593	0.00300593	0.00300593	0.00316881	0.00325027	0.00333171	0.00357638	0.00316926	0.0043101	0.004964	0.00504568	0.004964	0.00488233	0.0050464	0.00553687	0.00676443	0.00660016	0.00651831	0.00651831	0.00643734	0.00717417	0.00643644	0.00734068	0.00758623	0.00529097	0.00504574	0.00504648	0.00471937	0.00561792	0.00635413	0.00471911	0.00471911	0.00471911	0.00471911	0.00471911	0.00471911	0.00480076	0.00463745	0.00463713	0.00439225	0.00455518	0.00488244
70	A_chicken_ZA_412381_2021_SA10	0.00520985	0.00586442	0.00561859	0.00578214	0.00325024	0.00325024	0.00325024	0.00325024	0.00325024	0.00341318	0.00349467	0.00357614	0.00382091	0.00341366	0.00455489	0.00520907	0.00529078	0.00520907	0.00512737	0.00529153	0.00578219	0.00717408	0.00700969	0.00692779	0.00692779	0.00684683	0.00758408	0.00684587	0.00758674	0.00783236	0.00553617	0.00529084	0.00529162	0.00496437	0.00586323	0.00659971	0.0049641	0.0049641	0.0049641	0.0049641	0.0049641	0.0049641	0.00504578	0.0048824	0.00488207	0.0046371	0.00480008	0.00512749
71	A_chicken_ZA_411542_2021_SA10	0.0057817	0.00643683	0.00619075	0.00635443	0.00382036	0.00382036	0.00382036	0.00382036	0.00382036	0.00398343	0.00406498	0.00414651	0.00439151	0.003984	0.00512604	0.00578083	0.0058626	0.00578083	0.00569907	0.00586344	0.00635448	0.00774746	0.0075829	0.00750094	0.00750094	0.00742	0.00815778	0.00741896	0.00799647	0.00824219	0.0059446	0.00569913	0.00586354	0.00553599	0.00627184	0.00700871	0.00553568	0.00553568	0.00553568	0.00553568	0.00553568	0.00553568	0.00561743	0.00545392	0.00545356	0.00520838	0.00537145	0.0056992
72	A_chicken_ZA_DW2201_2022_SA10	0.00586312	0.00651828	0.00627219	0.00643588	0.00390164	0.00390164	0.00390164	0.00390164	0.00390164	0.00406471	0.00414627	0.0042278	0.00447282	0.00422841	0.00520739	0.00586223	0.00594401	0.00586223	0.00578046	0.00594486	0.00643593	0.00766496	0.00750043	0.00741849	0.00741849	0.00733755	0.0080752	0.00733653	0.00807804	0.00832377	0.00618962	0.00594408	0.00594495	0.00561738	0.00651696	0.00725405	0.00561707	0.00561707	0.00561707	0.00561707	0.00561707	0.00561707	0.00569882	0.00553531	0.00553493	0.00528975	0.00545282	0.0057806
73	A_chicken_ZA_JB2201_2022_SA10	0.00578136	0.00643644	0.00619038	0.00635405	0.00382014	0.00382014	0.00382014	0.00382014	0.00382014	0.00398319	0.00406474	0.00414627	0.00439125	0.00414686	0.00512574	0.00578049	0.00586225	0.00578049	0.00569873	0.00586309	0.00635411	0.00758299	0.00741849	0.00733655	0.00733655	0.00725561	0.00799318	0.0072546	0.00799599	0.0082417	0.00610784	0.00586232	0.00586319	0.00553566	0.00643514	0.00717214	0.00553535	0.00553535	0.00553535	0.00553535	0.00553535	0.00553535	0.00561709	0.0054536	0.00545323	0.00520808	0.00537113	0.00569886
74	A_chicken_ZA_697683_2022_SA10	0.00857086	0.00922914	0.00898174	0.00914615	0.00676351	0.00676351	0.00676351	0.00676351	0.00676351	0.00692735	0.0070093	0.0070912	0.00733755	0.00692834	0.00807543	0.00856956	0.00865169	0.00856956	0.00848743	0.00865294	0.00914622	0.010216	0.0102153	0.010133	0.010133	0.010052	0.0107928	0.0100506	0.0109615	0.0112082	0.00873416	0.00848753	0.00848878	0.00815964	0.00906286	0.00980301	0.00832337	0.00832337	0.00832337	0.00832337	0.00832337	0.00832337	0.00840548	0.00824124	0.00824068	0.0079944	0.00815801	0.00832341
75	A_European_white_stork_ZA_BA107_2022_SA10	0.00684582	0.00758411	0.00733752	0.00750148	0.00496264	0.00496264	0.00496264	0.00496264	0.00496264	0.00512598	0.00520768	0.00528935	0.00553484	0.00529011	0.0062706	0.00692671	0.00700863	0.00692671	0.00684481	0.00700963	0.00750154	0.00873262	0.00856774	0.00848567	0.00848567	0.00840474	0.00914356	0.00840357	0.00931123	0.00955735	0.00725469	0.00700871	0.00700974	0.00668154	0.00758257	0.00832088	0.00668117	0.00668117	0.00668117	0.00668117	0.00668117	0.00668117	0.00676305	0.00659927	0.00659882	0.00635322	0.00651649	0.00684498
76	A_chicken_ZA_PRL118_2022_SA12	0.00635499	0.00701078	0.00676443	0.00692826	0.0043916	0.0043916	0.0043916	0.0043916	0.0043916	0.00455482	0.00463645	0.00471806	0.00496333	0.00471873	0.00569853	0.00618947	0.00627129	0.00618947	0.00594408	0.00627219	0.00676351	0.00815726	0.00799258	0.00791058	0.00791058	0.00782964	0.00856781	0.00782855	0.00857082	0.0088167	0.00659982	0.00643596	0.0064369	0.006109	0.00700936	0.00774709	0.00610866	0.00610866	0.00610866	0.00610866	0.00610866	0.00610866	0.00619048	0.00602683	0.00602642	0.00578102	0.0059442	0.00627234
77	A_African_black_oystercatcher_ZA_682489_2022_SA13	0.00692928	0.00758577	0.00725714	0.00742112	0.006109	0.006109	0.006109	0.006109	0.006109	0.00627269	0.00635456	0.00610903	0.00668247	0.00643731	0.0074197	0.0044735	0.00455511	0.0044735	0.0043919	0.00455576	0.00471905	0.00610859	0.00594455	0.00586279	0.00586279	0.00561747	0.00651787	0.00561749	0.00684787	0.00709323	0.00643693	0.00602757	0.00602759	0.00586433	0.00660069	0.0065188	0.005864	0.005864	0.005864	0.005864	0.005864	0.005864	0.00594581	0.00578219	0.0057818	0.00553645	0.00569961	0.00602764
78	A_Common_tern_ZA_681998_CT010_2022_SA13	0.00692779	0.00758414	0.00709168	0.00725558	0.00610769	0.00610769	0.00610769	0.00610769	0.00610769	0.00627134	0.0063532	0.00610771	0.00668103	0.00643593	0.00741811	0.00447254	0.00455413	0.00447254	0.00439096	0.00455478	0.00471804	0.0059437	0.00577975	0.00569803	0.00569803	0.00545282	0.00618915	0.00545284	0.00684639	0.00709171	0.00643555	0.00602627	0.0061908	0.00586307	0.00676303	0.00668114	0.00586274	0.00586274	0.00586274	0.00586274	0.00586274	0.00586274	0.00594453	0.00578095	0.00578055	0.00553526	0.00569839	0.00602635
79	A_Common_tern_ZA_686940_CT013_2022_SA13	0.00692887	0.00758532	0.00725671	0.00742068	0.00610864	0.00610864	0.00610864	0.00610864	0.00610864	0.00627232	0.00635418	0.00610866	0.00668207	0.00643693	0.00741926	0.00447323	0.00455484	0.00447323	0.00439164	0.00455549	0.00488211	0.00610823	0.0059442	0.00586244	0.00586244	0.00561714	0.00651748	0.00561716	0.00684746	0.00709281	0.00643655	0.00602721	0.00619176	0.00586398	0.00660029	0.00651841	0.00586365	0.00586365	0.00586365	0.00586365	0.00586365	0.00586365	0.00594545	0.00578184	0.00578145	0.00553612	0.00569927	0.00602728
80	A_African_penguin_ZA_693215_P10347_2022_SA13	0.00783027	0.00848763	0.00815853	0.00832271	0.0070088	0.0070088	0.0070088	0.0070088	0.0070088	0.00717268	0.00725466	0.00700882	0.00758302	0.00733764	0.00832112	0.00537111	0.00545282	0.00537111	0.00528941	0.0054536	0.00578065	0.00700832	0.00684402	0.00676217	0.00676217	0.00651655	0.00741811	0.00651657	0.00774882	0.00799443	0.0073372	0.00692732	0.00709222	0.00676394	0.00750115	0.00741917	0.00676357	0.00676357	0.00676357	0.00676357	0.00676357	0.00676357	0.00684547	0.00668165	0.0066812	0.00643555	0.00659885	0.00676359
81	A_African_penguin_ZA_693215_P20348_2022_SA13	0.00783027	0.00848763	0.00815853	0.00832271	0.0070088	0.0070088	0.0070088	0.0070088	0.0070088	0.00717268	0.00725466	0.00700882	0.00758302	0.00733764	0.00832112	0.00537111	0.00545282	0.00537111	0.00528941	0.0054536	0.00578065	0.00700832	0.00684402	0.00676217	0.00676217	0.00651655	0.00741811	0.00651657	0.00774882	0.00799443	0.0073372	0.00692732	0.00709222	0.00676394	0.00750115	0.00741917	0.00676357	0.00676357	0.00676357	0.00676357	0.00676357	0.00676357	0.00684547	0.00668165	0.0066812	0.00643555	0.00659885	0.00676359
82	A_Cape_cormorant_ZA_21090179C_2021_SA13	0.00488132	0.00553531	0.00520801	0.00537141	0.0040644	0.0040644	0.0040644	0.0040644	0.0040644	0.0042275	0.00430908	0.00406442	0.0046357	0.00439125	0.00537039	0.00243515	0.00251647	0.00243515	0.00235383	0.00251683	0.0028423	0.00390106	0.0037378	0.00365634	0.00365634	0.00324909	0.00430877	0.00276066	0.00480004	0.00504468	0.00439099	0.00398313	0.00414681	0.00382033	0.00471738	0.00496228	0.00382012	0.00382012	0.00382012	0.00382012	0.00382012	0.00382012	0.00390164	0.0037386	0.00373835	0.00349389	0.0036566	0.00398318
83	A_Cape_cormorant_ZA_21100176B_2021_SA13	0.00496299	0.00561707	0.00528973	0.00545314	0.00414596	0.00414596	0.00414596	0.00414596	0.00414596	0.00430908	0.00439066	0.00414597	0.00471733	0.00447286	0.00545211	0.00251648	0.00259781	0.00251648	0.00243516	0.00259818	0.00292369	0.00398259	0.0038193	0.00373783	0.00373783	0.00333053	0.00439035	0.00284204	0.00488171	0.00512637	0.00447259	0.00406468	0.00422839	0.00390187	0.00479903	0.00504395	0.00390165	0.00390165	0.00390165	0.00390165	0.00390165	0.00390165	0.00398318	0.00382012	0.00381987	0.00357537	0.0037381	0.00406472
84	A_Cape_cormorant_ZA_21100109B_2021_SA13	0.00528975	0.00594417	0.00561664	0.00578014	0.00447224	0.00447224	0.00447224	0.00447224	0.00447224	0.00463544	0.00471707	0.00447226	0.00504391	0.00479935	0.00577904	0.00284189	0.00292326	0.00284189	0.00276053	0.00292368	0.00324935	0.0042272	0.00414538	0.00406387	0.00406387	0.00365637	0.00471673	0.00300439	0.00520845	0.00545321	0.00479907	0.00439094	0.00455478	0.00422807	0.00512566	0.00537071	0.00422784	0.00422784	0.00422784	0.00422784	0.00422784	0.00422784	0.0043094	0.00414627	0.00414599	0.00390137	0.00406416	0.00439099
85	A_Cape_cormorant_ZA_21100109A_2021_SA13	0.00569837	0.00635322	0.00602546	0.00618906	0.00488027	0.00488027	0.00488027	0.00488027	0.00488027	0.00504357	0.00512525	0.00488029	0.00545232	0.00520764	0.00618788	0.00324885	0.00333027	0.00324885	0.00316744	0.00333075	0.00365662	0.00463505	0.00455316	0.0044716	0.0044716	0.00406385	0.00512488	0.00341142	0.00561705	0.00586193	0.00520733	0.00479895	0.00496295	0.00463601	0.00553412	0.00577931	0.00463575	0.00463575	0.00463575	0.00463575	0.00463575	0.00463575	0.00471737	0.00455413	0.00455383	0.00430906	0.00447192	0.00479901
86	A_Kelp_gull_ZA_22010082_2022_SA13	0.00569837	0.00635322	0.00602546	0.00618906	0.00488027	0.00488027	0.00488027	0.00488027	0.00488027	0.00504357	0.00512525	0.00488029	0.00545232	0.00520764	0.00618788	0.00324885	0.00333027	0.00324885	0.00316744	0.00333075	0.00365662	0.00463505	0.00455316	0.0044716	0.0044716	0.00406385	0.00512488	0.00341142	0.00561705	0.00586193	0.00520733	0.00479895	0.00496295	0.00463601	0.00553412	0.00577931	0.00463575	0.00463575	0.00463575	0.00463575	0.00463575	0.00463575	0.00471737	0.00455413	0.00455383	0.00430906	0.00447192	0.00479901
87	A_Common_tern_ZA_693799_DOA236_2022_SA13	0.00791282	0.00857031	0.00824114	0.00840535	0.00709117	0.00709117	0.00709117	0.00709117	0.00709117	0.00725509	0.00733708	0.0070912	0.00766551	0.00742009	0.00840374	0.00545317	0.00553489	0.00545317	0.00537145	0.00553568	0.00586279	0.00709069	0.00692636	0.00684449	0.00684449	0.00659882	0.00750055	0.00659885	0.00783136	0.00807701	0.00741964	0.00700969	0.00717463	0.00684628	0.00758363	0.00750163	0.0068459	0.0068459	0.0068459	0.0068459	0.0068459	0.0068459	0.00692782	0.00676397	0.00676351	0.00651782	0.00668114	0.00700977
88	A_Cape_cormorant_ZA_681998_DOA059_2022_SA13	0.00692732	0.00758363	0.0070912	0.00725509	0.00610728	0.00610728	0.00610728	0.00610728	0.00610728	0.00627092	0.00635277	0.0061073	0.00668058	0.0064355	0.0074176	0.00447224	0.00455383	0.00447224	0.00439066	0.00455448	0.00488103	0.00594325	0.00577931	0.0056976	0.0056976	0.00545241	0.00635231	0.00545243	0.00684593	0.00709123	0.00643511	0.00602587	0.00619038	0.00586267	0.00676257	0.00668069	0.00586235	0.00586235	0.00586235	0.00586235	0.00586235	0.00586235	0.00594413	0.00578055	0.00578016	0.00553489	0.005698	0.00602594
89	A_Swift_tern_ZA_681998_ST009_2022_SA13	0.0070098	0.00766624	0.00717371	0.00733764	0.00618957	0.00618957	0.00618957	0.00618957	0.00618957	0.00635325	0.00643511	0.0061896	0.006763	0.00651787	0.00750017	0.00455419	0.00463579	0.00455419	0.00447259	0.00463645	0.00496307	0.00602551	0.00586153	0.0057798	0.0057798	0.00553456	0.00643465	0.00553458	0.00676451	0.0070098	0.00651748	0.00610815	0.00627271	0.00594493	0.006845	0.00676311	0.0059446	0.0059446	0.0059446	0.0059446	0.0059446	0.0059446	0.0060264	0.00586279	0.00586239	0.00561707	0.00578021	0.00610823
90	A_African_penguin_ZA_669895_AP639_2021_SA13	0.00619263	0.00684838	0.00635633	0.0065201	0.00537335	0.00537335	0.00537335	0.00537335	0.00537335	0.00553687	0.00561865	0.00537337	0.00594618	0.00570122	0.00668269	0.00390275	0.0039843	0.00390275	0.00382121	0.00398487	0.00431125	0.00537295	0.00537256	0.00529086	0.00529086	0.00488238	0.00594538	0.00504576	0.00611119	0.00635636	0.00570088	0.00545544	0.00545624	0.00512883	0.0060281	0.00594628	0.00512855	0.00512855	0.00512855	0.00512855	0.00512855	0.00512855	0.00521027	0.00504682	0.00504648	0.00480139	0.00496443	0.00529202
91	A_Cormorant_Namibia_141_2022_H5N1_SA13	0.00627266	0.00692832	0.00660013	0.00676391	0.00545351	0.00545351	0.00545351	0.00545351	0.00545351	0.005617	0.00569877	0.00545353	0.00602625	0.00578134	0.00676262	0.00382011	0.00390162	0.00382011	0.0037386	0.00390218	0.00422843	0.00528968	0.00512594	0.00504429	0.00504429	0.00488099	0.00569837	0.00479935	0.0061913	0.00643642	0.00578099	0.00537213	0.00553641	0.00520905	0.00610815	0.00618997	0.00520876	0.00520876	0.00520876	0.00520876	0.00520876	0.00520876	0.00529046	0.00512704	0.0051267	0.00488165	0.00504466	0.0053722
92	A_African_penguin_ZA_698162_AP446_2022_SA13	0.00857027	0.00922852	0.00889895	0.00906332	0.00774762	0.00774762	0.00774762	0.00774762	0.00774762	0.00791171	0.00799379	0.00774765	0.00832261	0.00807697	0.00906159	0.00610774	0.00618955	0.00610774	0.00602594	0.00619043	0.0065179	0.00774709	0.00758254	0.00750058	0.00750058	0.00725466	0.00815739	0.00725469	0.00832453	0.00857034	0.00807649	0.00766609	0.0078313	0.00750256	0.00824065	0.00815856	0.00750214	0.00750214	0.00750214	0.00750214	0.00750214	0.00750214	0.00758414	0.00742012	0.00741961	0.00717366	0.00733711	0.00766618
93	A_African_penguin_ZA_700164_DOA318_2022_SA13	0.00840551	0.00906354	0.00873409	0.00889841	0.00758314	0.00758314	0.00758314	0.00758314	0.00758314	0.00774719	0.00782924	0.00758317	0.00815795	0.00791238	0.00889671	0.0059438	0.00602558	0.0059438	0.00586202	0.00602644	0.0063538	0.00758263	0.00741814	0.00733621	0.00733621	0.00709036	0.0079928	0.00709038	0.00815984	0.00840558	0.0079119	0.00750163	0.00766676	0.00733813	0.00807601	0.00799395	0.00733773	0.00733773	0.00733773	0.00733773	0.00733773	0.00733773	0.0074197	0.00725573	0.00725524	0.00700936	0.00717277	0.00750172
94	A_African_penguin_ZA_702068_DOA370_2022_DOA370_SA13	0.00881748	0.00947604	0.0091463	0.00931075	0.0079944	0.0079944	0.0079944	0.0079944	0.0079944	0.00815856	0.00824068	0.00799443	0.00856966	0.00832394	0.00930897	0.00635373	0.00643557	0.00635373	0.00627189	0.0064365	0.0067641	0.00799386	0.00782921	0.00774722	0.00774722	0.00750118	0.00840434	0.00750121	0.00857164	0.00881755	0.00832344	0.00791285	0.00807817	0.00774926	0.00848767	0.00840555	0.00774882	0.00774882	0.00774882	0.00774882	0.00774882	0.00774882	0.00783086	0.00766676	0.00766624	0.00742018	0.00758369	0.00791294
95	A_African_penguin_ZA_702626_AP821_2022_SA13	0.00906481	0.00972369	0.00939378	0.0095583	0.00815922	0.00815922	0.00815922	0.00815922	0.00815922	0.00832344	0.00840558	0.00815925	0.00873468	0.00848889	0.00947422	0.00659985	0.00668173	0.00659985	0.00651797	0.00668269	0.00701044	0.00824075	0.00807601	0.00799398	0.00799398	0.00774784	0.00865142	0.00766585	0.00881889	0.00906488	0.00857052	0.00815974	0.00832517	0.00799609	0.00873482	0.00865266	0.00799564	0.00799564	0.00799564	0.00799564	0.00799564	0.00799564	0.00807772	0.00791354	0.00791301	0.00766683	0.00766628	0.00815984
96	A_African_penguin_ZA_702626_DOA410_2022_SA13	0.00906481	0.00972369	0.00939378	0.0095583	0.00824131	0.00824131	0.00824131	0.00824131	0.00824131	0.00840555	0.0084877	0.00824134	0.00881684	0.00857103	0.00955647	0.00659985	0.00668173	0.00659985	0.00651797	0.00668269	0.00701044	0.00824075	0.00807601	0.00799398	0.00799398	0.00774784	0.00865142	0.00774787	0.00881889	0.00906488	0.00857052	0.00815974	0.00832517	0.00799609	0.00873482	0.00865266	0.00799564	0.00799564	0.00799564	0.00799564	0.00799564	0.00799564	0.00807772	0.00791354	0.00791301	0.00766683	0.00766628	0.00815984
97	A_African_penguin_ZA_698730_DOA308_2022_SA13	0.00840602	0.00906409	0.00873461	0.00889895	0.0075836	0.0075836	0.0075836	0.0075836	0.0075836	0.00774765	0.00782971	0.00758363	0.00815843	0.00791285	0.00889724	0.00594415	0.00602594	0.00594415	0.00586237	0.0060268	0.00635418	0.00758308	0.00741858	0.00733664	0.00733664	0.00709078	0.00799328	0.00709081	0.00816032	0.00840608	0.00791238	0.00750208	0.00766722	0.00733857	0.00807649	0.00799443	0.00733816	0.00733816	0.00733816	0.00733816	0.00733816	0.00733816	0.00742015	0.00725616	0.00725567	0.00700977	0.0071732	0.00750217
98	A_Common_tern_ZA_22060305_2022_SA13	0.00733919	0.00799612	0.00750321	0.00766725	0.00651831	0.00651831	0.00651831	0.00651831	0.00651831	0.0066821	0.00676402	0.00651834	0.00709216	0.00684688	0.00782983	0.00488171	0.00496337	0.00488171	0.00480006	0.00496408	0.00529093	0.00651787	0.0063537	0.00627189	0.00627189	0.00602642	0.00692741	0.00602644	0.00725775	0.00750324	0.00684648	0.00643685	0.00660158	0.00627354	0.00717423	0.00709227	0.00627319	0.00627319	0.00627319	0.00627319	0.00627319	0.00627319	0.00635504	0.00619132	0.0061909	0.0059454	0.00610864	0.00643693
99	A_cormorant_ZA_21120147_2021_SA14	0.0048004	0.00529019	0.0052088	0.00537222	0.00398348	0.00398348	0.00398348	0.00398348	0.00398348	0.00414658	0.00422816	0.00430971	0.00455478	0.00431033	0.0052895	0.00300506	0.00308646	0.00300506	0.00292367	0.0030869	0.0034127	0.00284264	0.00251697	0.00227297	0.00227297	0.00251735	0.00324975	0.00267973	0.0053726	0.00561745	0.00431007	0.00390219	0.00406587	0.00373939	0.00463647	0.0050447	0.00373918	0.00373918	0.00373918	0.00373918	0.00373918	0.00373918	0.0038207	0.00365766	0.00365742	0.00341295	0.00357567	0.00390224
100	A_Dove_Botswana_2097_2021_H5N1_SA15	0.0112999	0.0117964	0.0115477	0.0117129	0.0104723	0.0104723	0.0104723	0.0104723	0.0104723	0.0106372	0.0107198	0.0108022	0.0110505	0.0106387	0.0117932	0.0112981	0.0113807	0.011133	0.0112156	0.0113823	0.0118782	0.0132847	0.0129526	0.0130354	0.0130354	0.0129545	0.0136991	0.0131182	0.0133723	0.01362	0.0114636	0.0112156	0.0112173	0.0108862	0.011794	0.012538	0.0110507	0.0110507	0.0110507	0.0110507	0.0110507	0.0110507	0.0111333	0.0109682	0.0109674	0.0107199	0.0107191	0.0110508
101	A_ostrich_ZA_PRL060_2022_SA15	0.0194625	0.0199663	0.0195462	0.0197136	0.0186221	0.0186221	0.0186221	0.0186221	0.0186221	0.0187893	0.0188729	0.0189564	0.0192085	0.0187919	0.0197934	0.0194595	0.0195432	0.0192922	0.0193759	0.019546	0.0200486	0.0212221	0.020969	0.0212207	0.0212207	0.0209721	0.0218938	0.0213046	0.0215655	0.021648	0.0194599	0.0192085	0.0193788	0.0190427	0.0199621	0.0207159	0.019209	0.019209	0.019209	0.019209	0.019209	0.019209	0.0192926	0.0191253	0.019124	0.0188731	0.0188717	0.0192091
102	A_chicken_Senegal_21VIR1084_3_2021_H5N1	0.00537501	0.00586623	0.00529323	0.00545675	0.00455684	0.00455684	0.00455684	0.00455684	0.00455684	0.00472017	0.00480186	0.00488352	0.00512897	0.0047208	0.00586467	0.00537419	0.00545595	0.00537419	0.00529245	0.00545673	0.00594766	0.00734034	0.00701191	0.0070939	0.0070939	0.00701291	0.00775056	0.00717587	0.00775328	0.00799903	0.00553787	0.00545601	0.00545682	0.00512937	0.00602873	0.00676562	0.00512909	0.00512909	0.00512909	0.00512909	0.00512909	0.00512909	0.00521082	0.00504735	0.00504701	0.00480189	0.00496495	0.00512911
[truncated: 54 more columns]
