# Supplementary figures and images for: The Molecular Epidemiology of Clade 2.3.4.4B H5N1 High Pathogenicity Avian Influenza in Southern Africa, 2021–2022
Source: MDPI journal article supplement (doi:10.3390/v15061383), 2023-06-16

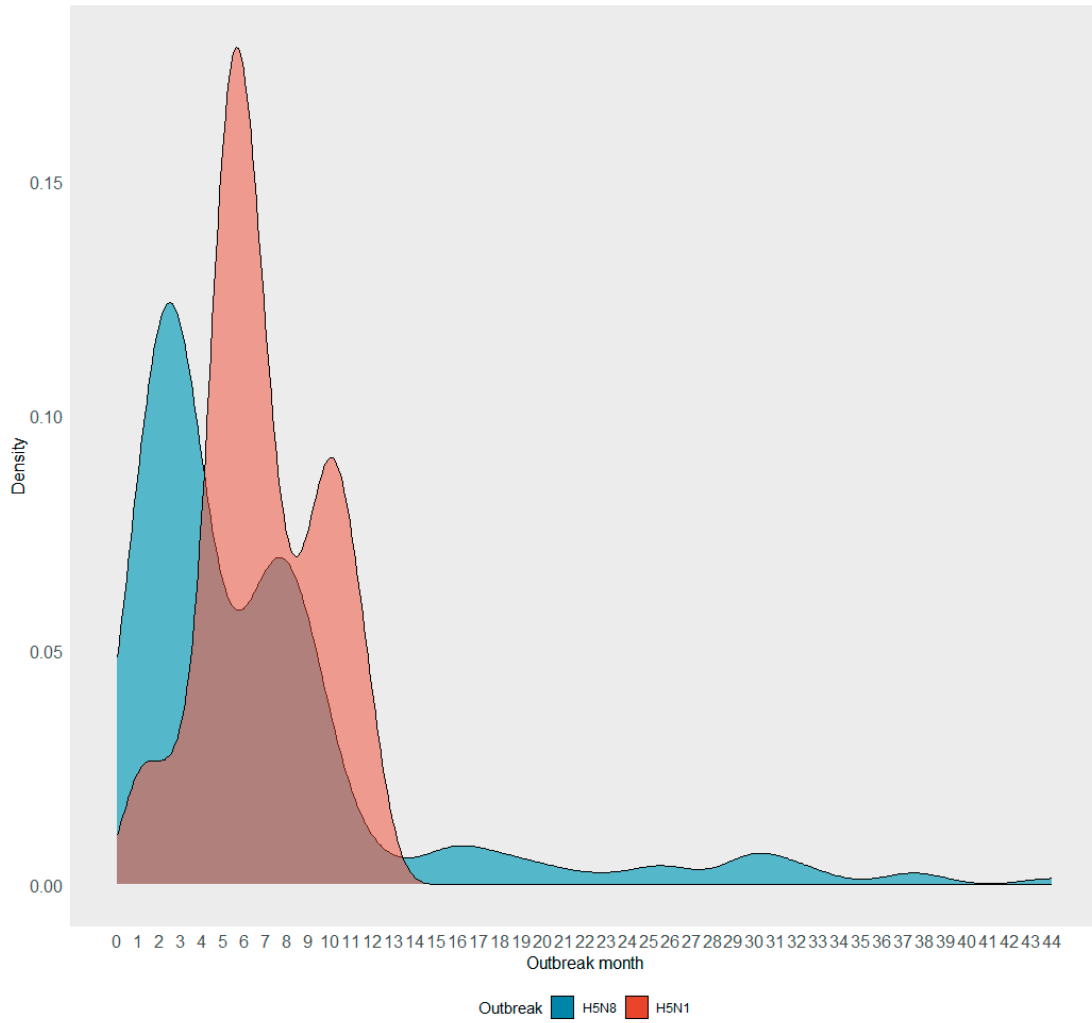

**Figure S2.** Density plot of HPAI outbreaks in South Africa by month.

Supplement: s1 [file s1]

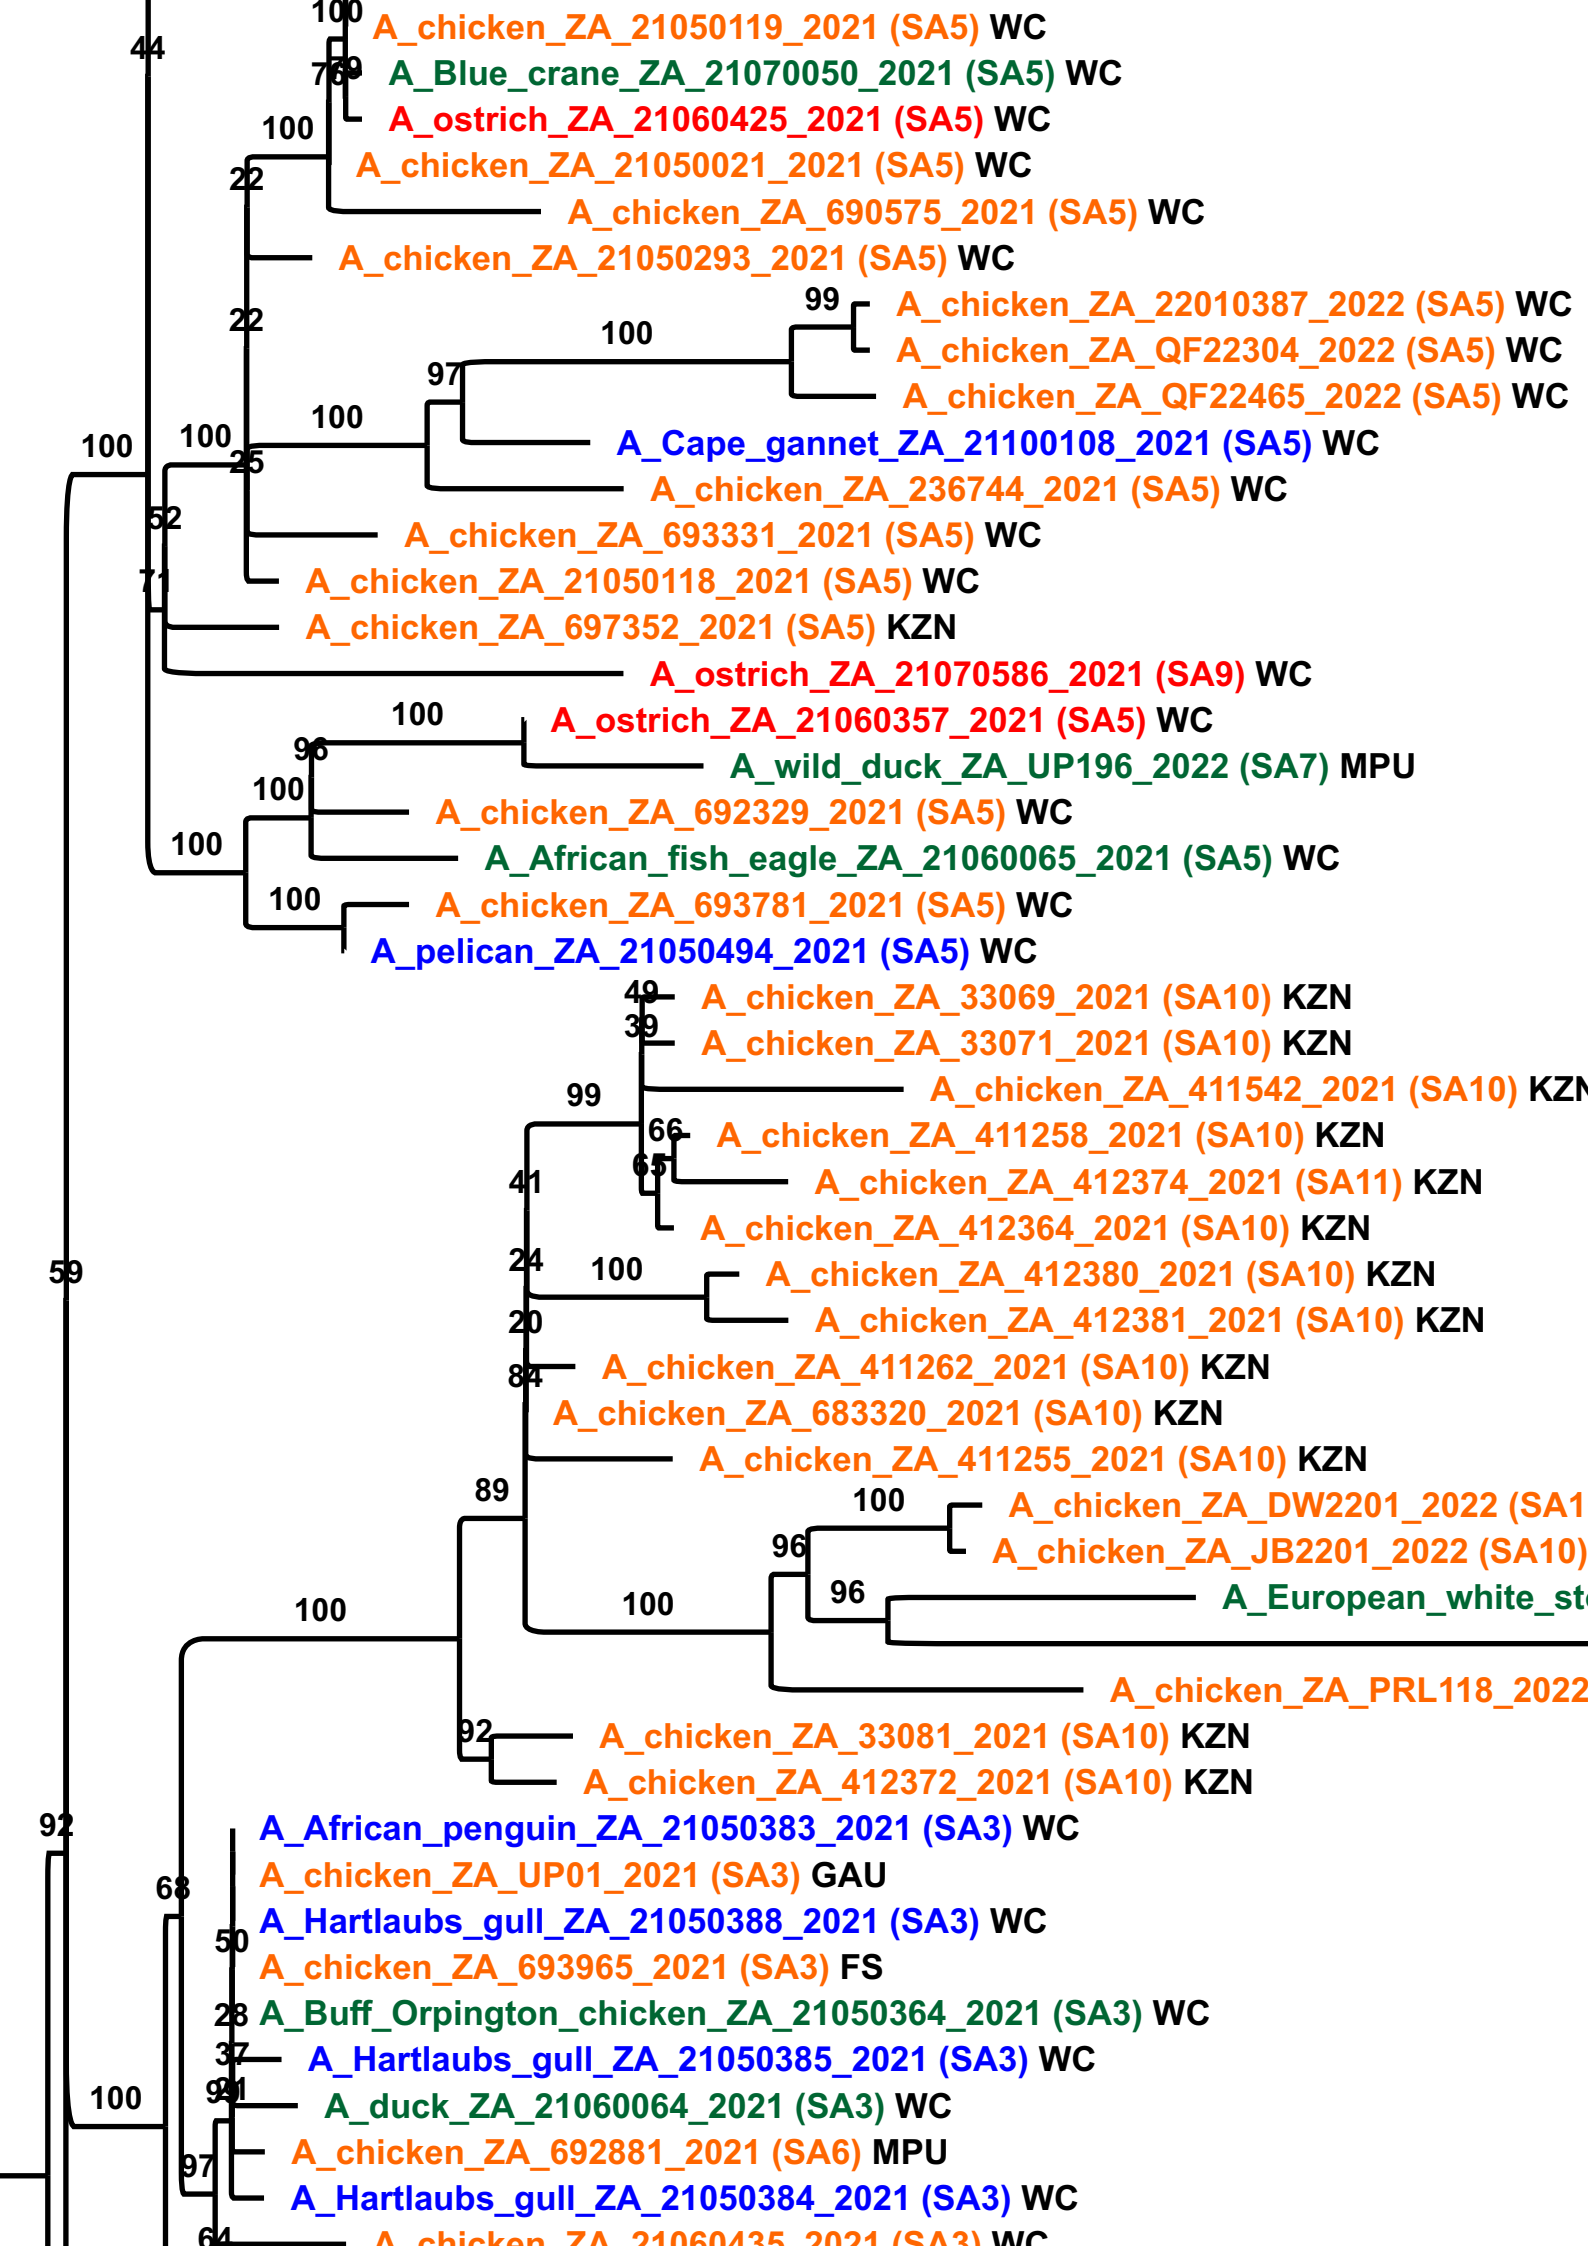

Supplement: s1 [file s1]

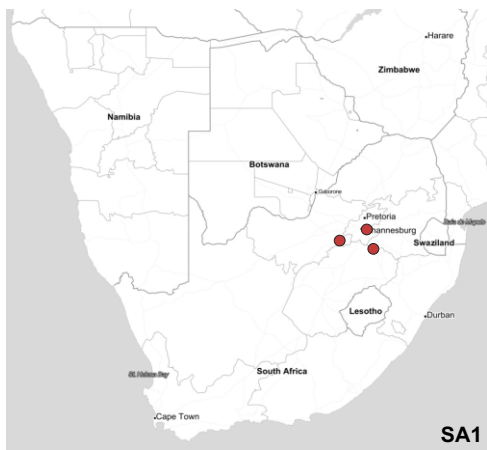

SA1

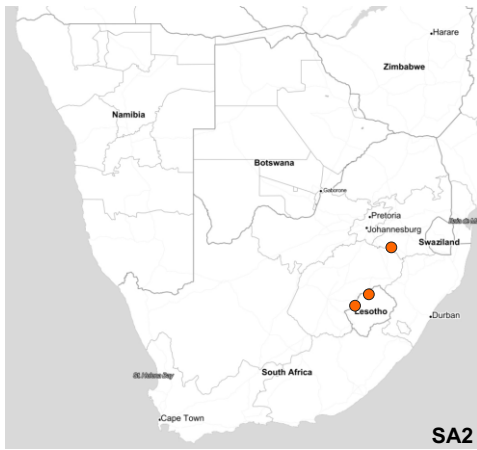

SA2

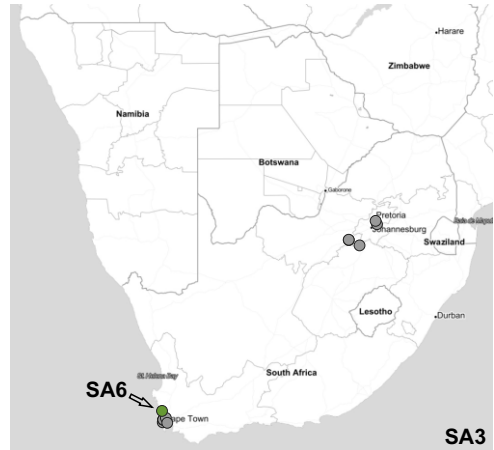

SA3

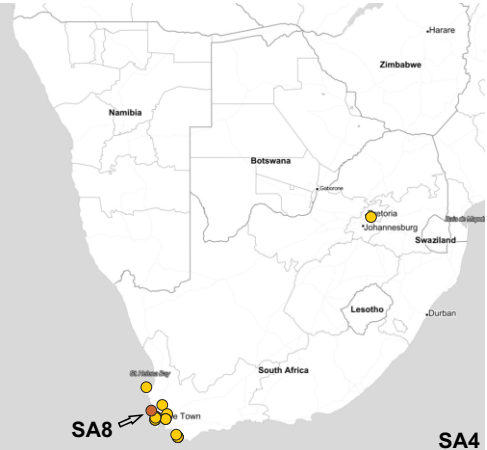

SA4

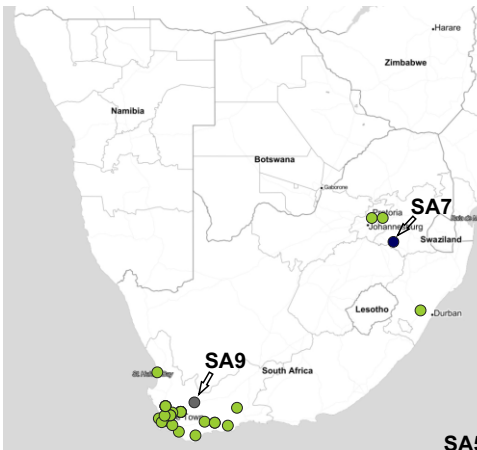

SA5

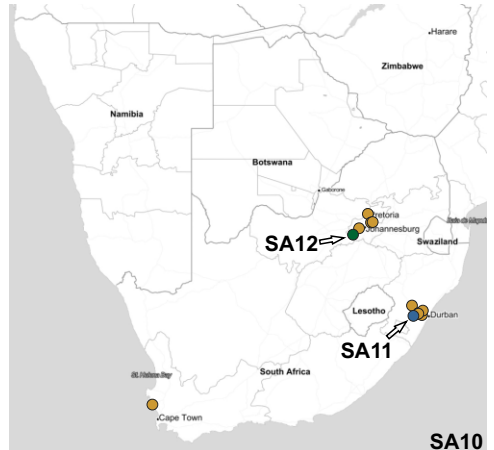

SA6

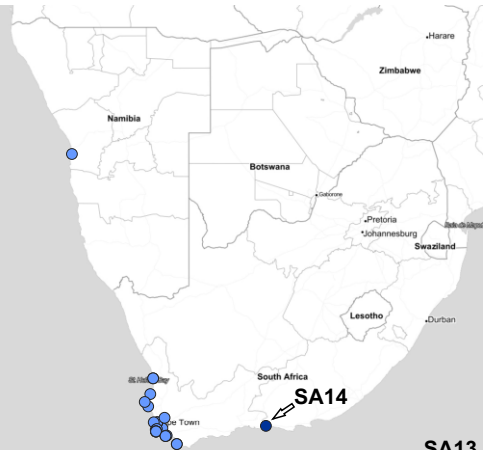

SA7

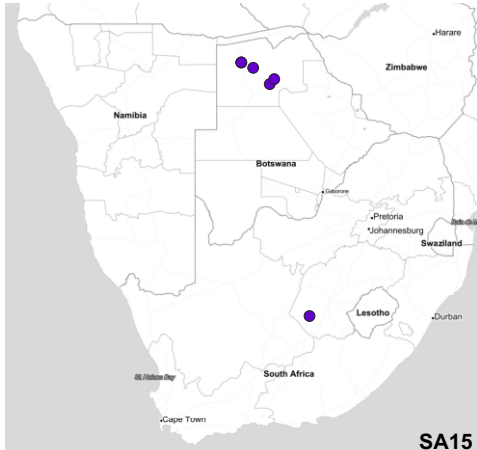

SA8

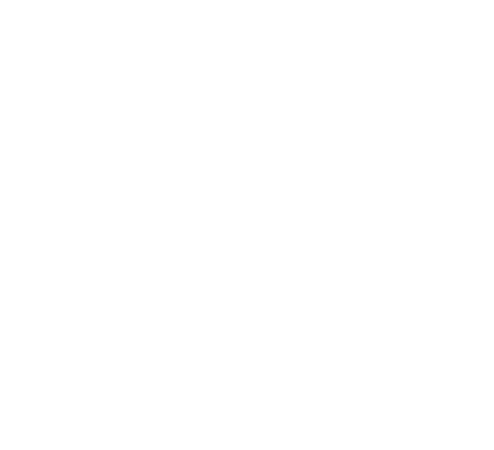

SA9

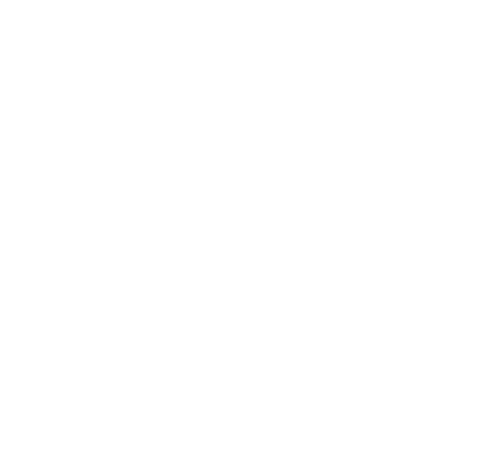

SA10

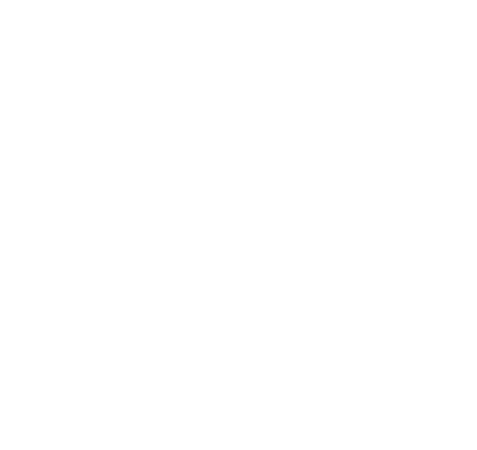

SA11



SA12

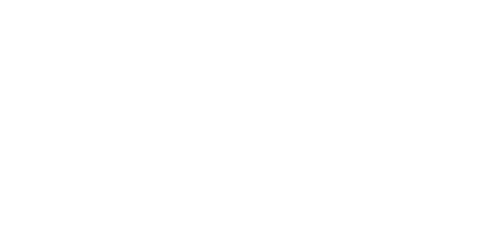

SA13

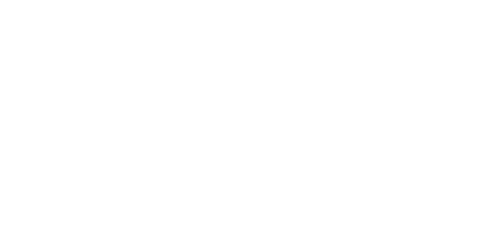

SA14

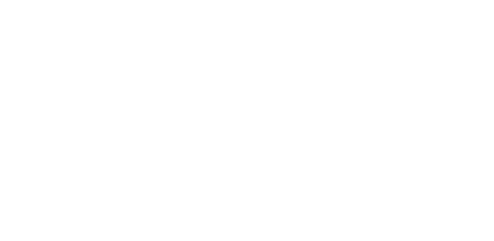

SA15

Supplement: s1 [file s1]

EPI\_ISL\_2276071\_A\_great\_white\_pelican\_Senegal\_21\_67\_21VIR10

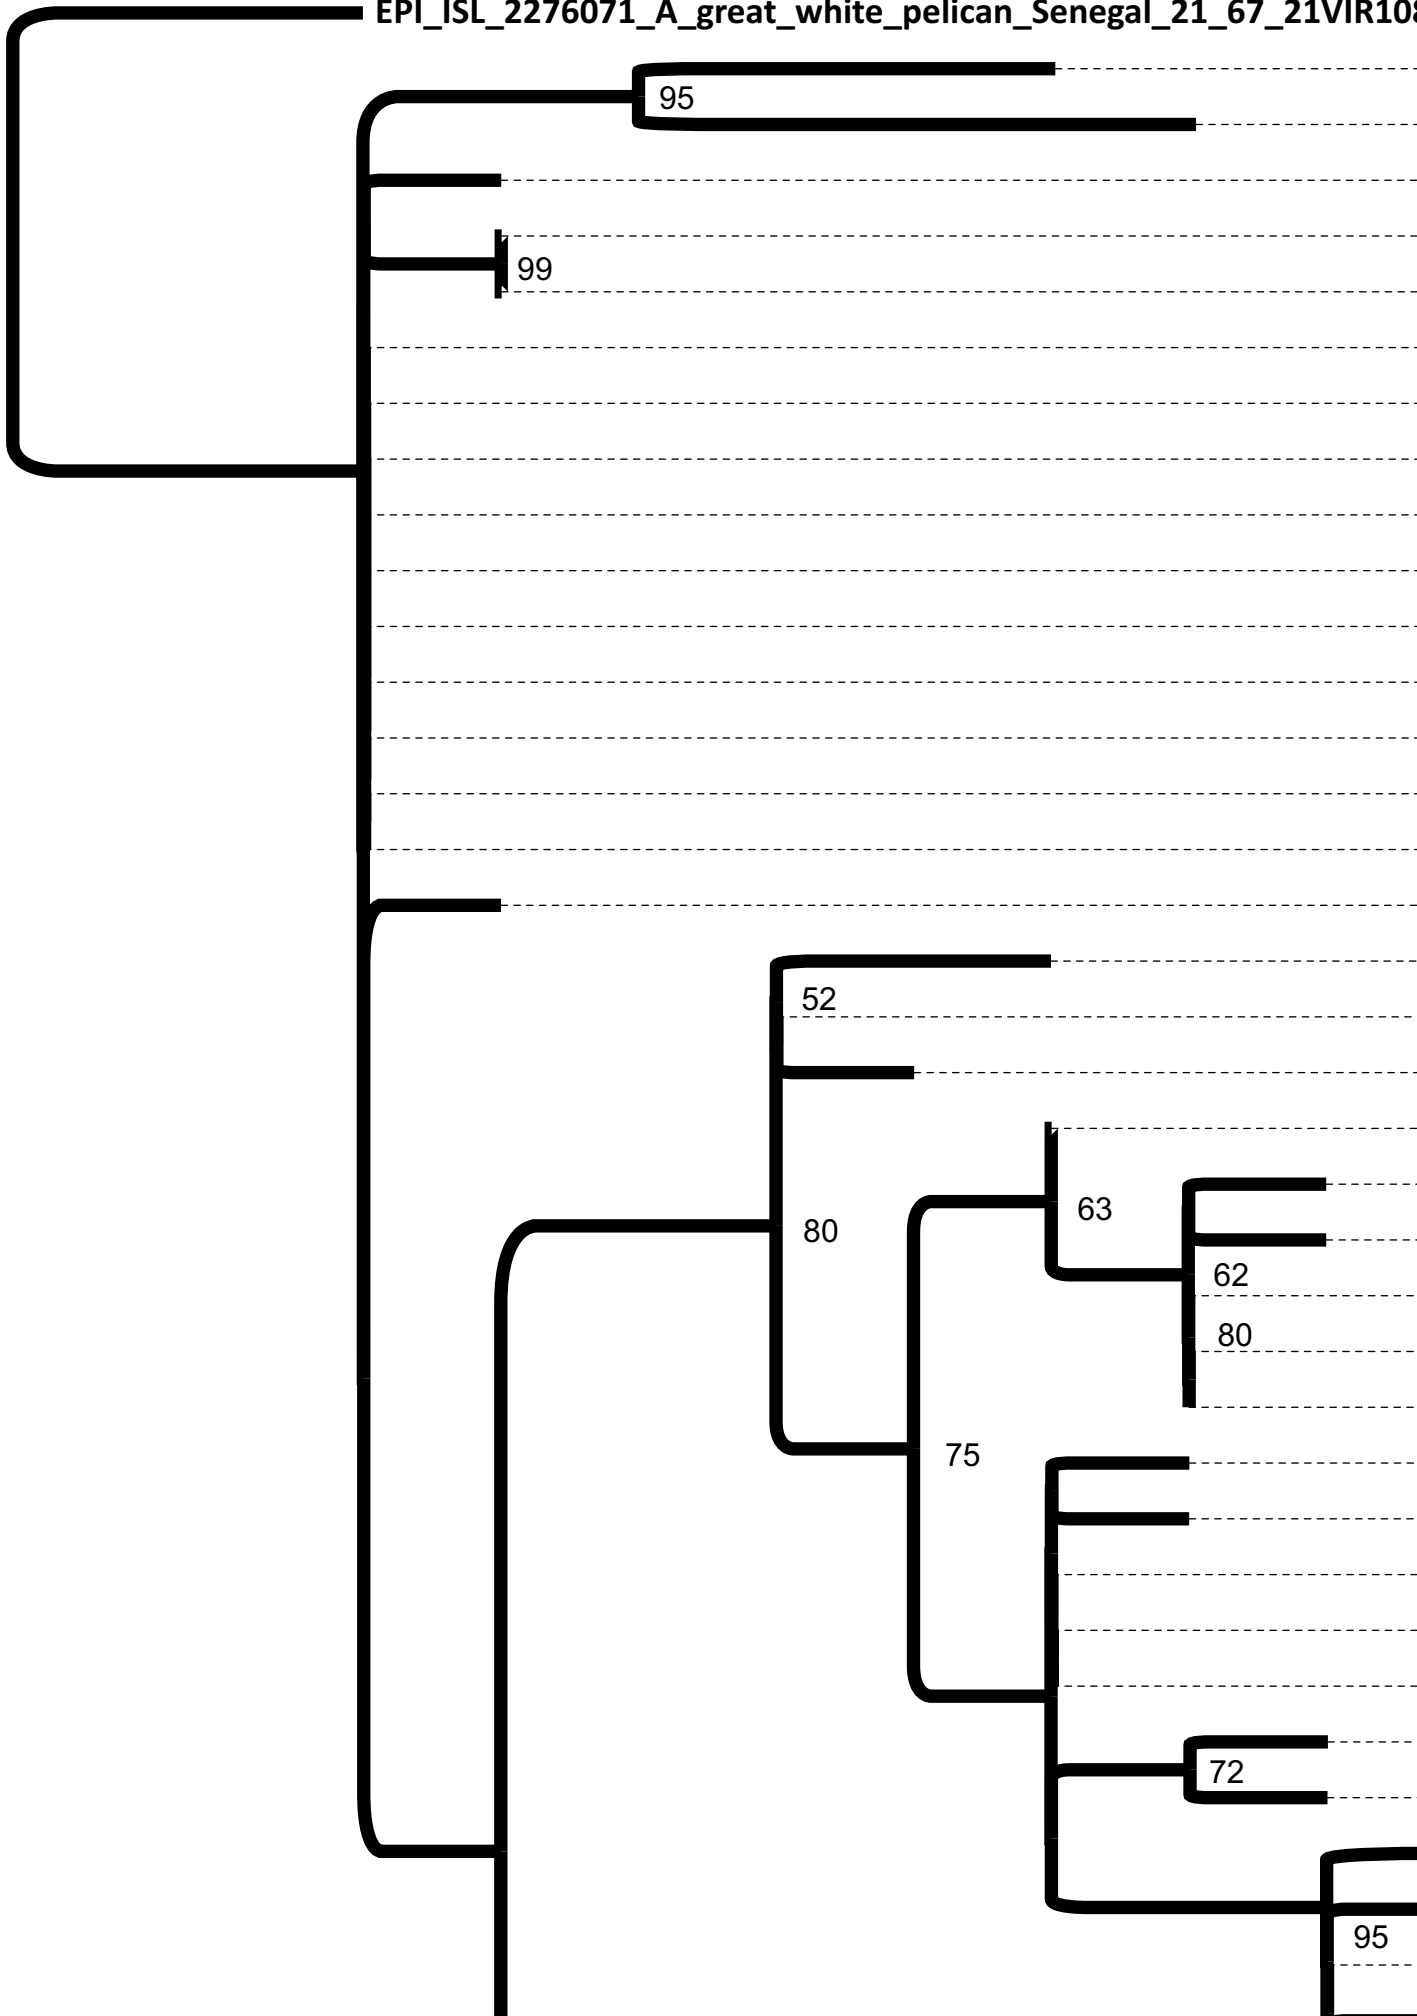

Supplement: s1 [file s1]
